# 1 **Connecting genomic and proteomic signatures of amyloid burden** 2 **in the brain**

3 Raquel Puerta<sup>1,2†</sup>, Itziar de Rojas<sup>1,3†</sup>, Pablo García-González<sup>1,3</sup>, Clàudia Olivé<sup>1</sup>, Oscar  
4 Sotolongo-Grau<sup>1</sup>, Ainhoa García-Sánchez<sup>1</sup>, Fernando García-Gutiérrez<sup>1</sup>, Laura  
5 Montreal<sup>1</sup>, Juan Pablo Tartari<sup>1</sup>, Ángela Sanabria<sup>1,3</sup>, Vanesa Pytel<sup>1,3</sup>, Carmen Lage<sup>4,3</sup>, Inés  
6 Quintela<sup>5</sup>, Nuria Aguilera<sup>1</sup>, Eloy Rodriguez-Rodriguez<sup>4,3</sup>, Emilio Alarcón-Martín<sup>1</sup>, Adelina  
7 Orellana<sup>1,3</sup>, Pau Pastor<sup>6,7</sup>, Jordi Pérez-Tur<sup>8,3,9</sup>, Gerard Piñol-Ripoll<sup>10,11</sup>, Adolfo López de  
8 Munian<sup>12,13,3,14</sup>, Jose María García-Alberca<sup>15,3</sup>, Jose Luís Royo<sup>16</sup>, María Jesús  
9 Bullido<sup>17,3,18,19</sup>, Victoria Álvarez<sup>20,21</sup>, Luis Miguel Real<sup>22,16</sup>, Arturo Corbatón  
10 Anchuelo<sup>23</sup>, Dulcenombre Gómez-Garre<sup>23,24,25</sup>, María Teresa Martínez Larrad<sup>23,26</sup>, Emilio  
11 Franco-Macías<sup>27</sup>, Pablo Mir<sup>28,3</sup>, Miguel Medina<sup>29,3</sup>, Raquel Sánchez-Valle<sup>30</sup>, Oriol Dols-  
12 Icardo<sup>31</sup>, María Eugenia Sáez<sup>32</sup>, Ángel Carracedo<sup>5,33</sup>, Lluís Tàrraga<sup>1,3</sup>, Montse Alegret<sup>1,3</sup>, Sergi  
13 Valero<sup>1,3</sup>, Marta Marquíé<sup>1,3</sup>, Mercè Boada<sup>1,3</sup>, Pascual Sánchez Juan<sup>4,3</sup>, Jose Enrique  
14 Cavazos<sup>34,35</sup>, Alfredo Cabrera<sup>36</sup>, Amanda Cano<sup>1,3‡</sup>, Agustín Ruiz<sup>1,3,35‡,\*</sup> for the Alzheimer's  
15 Disease Neuroimaging Initiative.

16 <sup>1</sup>Ace Alzheimer Center Barcelona – Universitat Internacional de Catalunya, Spain. <sup>2</sup>Universitat  
17 de Barcelona (UB). <sup>3</sup>CIBERNED, Network Center for Biomedical Research in  
18 Neurodegenerative Diseases, National Institute of Health Carlos III, Madrid, Spain.  
19 <sup>4</sup>Neurology Service, Marqués de Valdecilla University Hospital (University of Cantabria and  
20 IDIVAL), Santander, Spain. <sup>5</sup>Grupo de Medicina Xenómica, Centro Nacional de Genotipado  
21 (CEGEN-PRB3-ISCI). Universidade de Santiago de Compostela, Santiago de Compostela,  
22 Spain. <sup>6</sup>Unit of Neurodegenerative diseases, Department of Neurology, University Hospital  
23 Germans Trias i Pujol, Badalona, Barcelona, Spain. <sup>7</sup>The Germans Trias i Pujol Research  
24 Institute (IGTP), Badalona, Barcelona, Spain. <sup>8</sup>Unitat de Genètica Molecular, Institut de  
25 Biomedicina de València-CSIC, Valencia, Spain. <sup>9</sup>Unidad Mixta de Neurología Genética,  
26 Instituto de Investigación Sanitaria La Fe, Valencia, Spain. <sup>10</sup>Unitat Trastorns Cognitius,  
27 Hospital Universitari Santa Maria de Lleida, Lleida, Spain. <sup>11</sup>Institut de Recerca Biomedica de  
28 Lleida (IRBLleida), Lleida, Spain. <sup>12</sup>Department of Neurology. Hospital Universitario  
29 Donostia. San Sebastian, Spain. <sup>13</sup>Department of Neurosciences. Faculty of Medicine and  
30 Nursery. University of the Basque Country, San Sebastián, Spain. <sup>14</sup>Neurosciences Area.  
31 Instituto Biodonostia. San Sebastian, Spain. <sup>15</sup>Alzheimer Research Center & Memory Clinic,  
32 **NOTE: This preprint reports new research that has not been certified by peer review and should not be used to guide clinical practice.**  
Andalusian Institute for Neuroscience, Málaga, Spain. <sup>16</sup>Departamento de Especialidades

33 Quirúrgicas, Bioquímica e Inmunología. School of Medicine. University of Malaga. Málaga,  
34 Spain. <sup>17</sup>Centro de Biología Molecular Severo Ochoa (UAM-CSIC). <sup>18</sup>Instituto de  
35 Investigación Sanitaria ‘Hospital la Paz’ (IdIPaz), Madrid, Spain. <sup>19</sup>Universidad Autónoma de  
36 Madrid. <sup>20</sup>Laboratorio de Genética. Hospital Universitario Central de Asturias, Oviedo, Spain.  
37 <sup>21</sup>Instituto de Investigación Sanitaria del Principado de Asturias (ISPA). <sup>22</sup>Unidad Clínica de  
38 Enfermedades Infecciosas y Microbiología. Hospital Universitario de Valme, Sevilla, Spain.  
39 <sup>23</sup>Instituto de Investigación Sanitaria del Hospital Clínico San Carlos (IdISSC), Hospital  
40 Clínico San Carlos. <sup>24</sup>Laboratorio de Riesgo Cardiovascular y Microbiota, Hospital Clínico  
41 San Carlos; Departamento de Fisiología, Facultad de Medicina, Universidad Complutense de  
42 Madrid (UCM). <sup>25</sup>Biomedical Research Networking Center in Cardiovascular Diseases  
43 (CIBERCV), Madrid, Spain. <sup>26</sup>Centro de Investigación Biomédica en Red de Diabetes y  
44 Enfermedades Metabólicas Asociadas (CIBERDEM). <sup>27</sup>Dementia Unit, Department of  
45 Neurology, Hospital Universitario Virgen del Rocío, Instituto de Biomedicina de Sevilla  
46 (IBiS), Sevilla, Spain. <sup>28</sup>Unidad de Trastornos del Movimiento, Servicio de Neurología y  
47 Neurofisiología. Instituto de Biomedicina de Sevilla (IBiS), Hospital Universitario Virgen del  
48 Rocío/CSIC/Universidad de Sevilla, Seville, Spain. <sup>29</sup>CIEN Foundation/Queen Sofia  
49 Foundation Alzheimer Center. <sup>30</sup>Alzheimer's disease and other cognitive disorders unit. Service  
50 of Neurology. Hospital Clínic of Barcelona. Institut d'Investigacions Biomèdiques August Pi i  
51 Sunyer, University of Barcelona, Barcelona, Spain. <sup>31</sup>Department of Neurology, Sant Pau  
52 Memory Unit, Sant Pau Biomedical Research Institute, Hospital de la Santa Creu i Sant Pau,  
53 Universitat Autònoma de Barcelona, Barcelona, Spain. <sup>32</sup>CAEBI, Centro Andaluz de Estudios  
54 Bioinformáticos, Sevilla, Spain. <sup>33</sup>Fundación Pública Galega de Medicina Xenómica –  
55 CIBERER-IDIS, Santiago de Compostela, Spain. <sup>34</sup>South Texas Medical Science Training  
56 Program, University of Texas Health San Antonio, San Antonio. <sup>35</sup>Glenn Biggs Institute for  
57 Alzheimer's & Neurodegenerative Diseases, University of Texas Health Science Center at San  
58 Antonio, 7703 Floyd Curl Dr, San Antonio, TX 78229 USA. <sup>36</sup>Neuroscience Therapeutic Area,  
59 Janssen Research & Development, Turnhoutseweg 30, 2340 Beerse, Belgium.

60 †First co-authors have contributed equally.

61 ‡Senior co-authors have contributed equally.

62 \* Correspondence to:

63 **Agustín Ruíz MD, PhD**

64 Address: Ace Alzheimer Center Barcelona.

65 C/ Marquès de Sentmenat, 57, 08029, Barcelona, Spain.

66 Tel: +34 93.444.73.18

67 E-mail address: [aruiz@fundacioace.org](mailto:aruiz@fundacioace.org)

68

## 69 **Abstract**

70 **Background** Alzheimer's disease (AD) has a high heritable component characteristic of  
71 complex diseases, yet many of the genetic risk factors remain unknown. We combined genome-  
72 wide association studies (GWAS) on amyloid endophenotypes measured in cerebrospinal fluid  
73 (CSF) and positron emission tomography (PET) as surrogates of amyloid pathology, which  
74 may be helpful to understand the underlying biology of the disease.

75 **Methods** We performed a meta-analysis of GWAS of CSF A $\beta$ 42 and PET measures combining  
76 six independent cohorts (n=2,076). Due to the opposite effect direction of A $\beta$  phenotypes in  
77 CSF and PET measures, only genetic signals in the opposite direction were considered for  
78 analysis (n=376,599). Polygenic risk scores (PRS) were calculated and evaluated for AD status  
79 and amyloid endophenotypes. We then searched the CSF proteome signature of brain  
80 amyloidosis using SOMAscan proteomic data (Ace cohort, n=1,008) and connected it with  
81 GWAS results of *loci* modulating amyloidosis. Finally, we compared our results with a large  
82 meta-analysis using publicly available datasets in CSF (n=13,409) and PET (n=13,116). This  
83 combined approach enabled the identification of overlapping genes and proteins associated  
84 with amyloid burden and the assessment of their biological significance using enrichment  
85 analyses.

86 **Results** After filtering the meta-GWAS, we observed genome-wide significance in the  
87 rs429358-*APOE* locus and nine suggestive hits were annotated. We replicated the *APOE* *loci*  
88 using the large CSF-PET meta-GWAS and identified multiple AD-associated genes as well as  
89 the novel *GADLI* locus. Additionally, we found a significant association between the AD PRS  
90 and amyloid levels, whereas no significant association was found between any A $\beta$  PRS with  
91 AD risk. CSF SOMAscan analysis identified 1,387 FDR-significant proteins associated with  
92 CSF A $\beta$ 42 levels. The overlap among GWAS *loci* and proteins associated with amyloid burden  
93 was very poor (n=35). The enrichment analysis of overlapping hits strongly suggested several  
94 signalling pathways connecting amyloidosis with the anchored component of the plasma  
95 membrane, synapse physiology and mental disorders that were replicated in the large CSF-PET  
96 meta-analysis.

97 **Conclusions** The strategy of combining CSF and PET amyloid endophenotypes GWAS with  
98 CSF proteome analyses might be effective for identifying signals associated with the AD  
99 pathological process and elucidate causative molecular mechanisms behind the amyloid  
100 mobilization in AD.

101 **Keywords:** A $\beta$ 42; CSF biomarkers; PET tomography; GWAS; Proteome.

102

103 **Abbreviations:** AD=Alzheimer's disease; ADNI=Alzheimer's Disease Neuroimaging  
104 Initiative; ASD=autism spectrum disorder; A $\beta$ =amyloid; A $\beta$ 42=amyloid beta 42;  
105 AV45=Florbetapir; CADD=Combined Annotation Dependent Depletion; CDR=Clinical  
106 Dementia Rating; CI=Confidence interval; eQTL=expression quantitative trait loci;  
107 FBB=Florbetaben; FDR=false discovery rate; FUMA=Functional Mapping and Annotation of  
108 Genome-Wide Association Studies; GPI=glycosylphosphatidyl inositol; GWAS=Genome-  
109 wide association studies; HC=Healthy Control; LP=lumbar puncture; MAC=minor allele  
110 count; MAF=minor allele frequency; MCI=Mild Cognitive impairment; MMSE=Mini-Mental  
111 State Exam; n=Sample size; NIA-AA=National Institute on Aging and Alzheimer's  
112 Association; NINCDS/ADRDA=National Institute of Neurological and Communicative  
113 Disorders and Stroke and Alzheimer's Disease and Related Disorders Association; OR=Odds  
114 ratio; P=p-value; p-tau=phosphorylated tau in Thr 181; PAD=publicly available datasets;  
115 PET=Positron Emission Tomography; PCA=principal component analysis; PCs=Principal  
116 components; pQTL=protein quantitative trait loci; PRS=Polygenic risk scores; RFU=relative  
117 fluorescent units; SCD=subjective cognitive decline; SNP=single nucleotide polymorphisms;  
118 t-tau=total tau;  $\lambda$ =genomic inflation factor.

119

120

121

122

123

124

125

126

## 127 **Background**

128 Alzheimer's disease (AD) is the most common cause of dementia. AD is a growing epidemic  
129 with an expected doubling of annual new diagnosis in the next 20 years prevalence and a major  
130 socioeconomic impact with a projected direct economic cost of \$2 trillion by 2030<sup>1-3</sup>. In this  
131 sense, increasing the knowledge of AD aetiology and biomarker development would be an  
132 interesting approach to developing a clear understanding of the disease pathophysiology and  
133 future drug developments. Genome wide association studies (GWAS) have permitted the  
134 discovery of more than 80 genetic variants associated with AD risk<sup>4,5</sup>. Despite the continued  
135 efforts led by international consortia, a large fraction of AD heritability remains to be  
136 elucidated since only 31% of AD genetic variance is explained by single-nucleotide  
137 polymorphisms (SNPs)<sup>6</sup>.

138 The analysis of heritable quantitative traits tightly linked to disease pathology, called  
139 endophenotypes, has become a promising approach in genetic studies<sup>7-9</sup>. These intermediate  
140 phenotypes might be influenced by the same genetic factors that confer risk to AD development  
141 and might have low genetic complexity. Compared to disease phenotypes, there are fewer  
142 genes or environmental influences affecting the genetic components of endophenotypes which  
143 facilitate finding a genuine association between these phenotypes and AD<sup>7,8,10</sup>.

144 The most common endophenotypes for AD are levels of amyloid beta (A $\beta$ 42), total tau (t-tau)  
145 and phosphorylated tau in threonine 181 (p-tau) in CSF<sup>10-12</sup>. Moreover, Positron Emission  
146 Tomography (PET) using several radiotracers for measuring amyloid and tau burden has been  
147 used as AD endophenotypes<sup>11,13,14</sup>. These biomarkers are surrogates of AD brain pathology and  
148 understanding their biology might provide insights into novel mechanisms of AD<sup>15,16</sup>. To date,  
149 relatively few AD *loci* have been identified using the endophenotype approach<sup>9,13</sup>. Moreover,  
150 GWAS analyses of PET and CSF endophenotypes are commonly analysed separately and  
151 comparisons between them have been overlooked.

152 In this study, we combined GWAS of A $\beta$  CSF levels from four different AD cohorts with two  
153 GWAS of A $\beta$ -burden measured using PET radiotracers. We used this strategy of combining  
154 both A $\beta$  endophenotypes (CSF and PET) to identify novel genetic variants associated with AD  
155 and to replicate known AD signals. We then tested polygenic risk scores (PRS) derived from  
156 large studies in our datasets, dissected the CSF proteome signature associated with brain

157 amyloidosis in a sizable CSF collection, and checked the overlapping of genomic meta-  
158 analyses and proteomic results.

159

## 160 **Materials and methods**

### 161 **GWAS Cohorts**

162 This study comprised a total of 2,076 individuals from Ace, Valdecilla and ADNI cohorts and  
163 had data for different A $\beta$  CSF or PET endophenotypes (Supplementary Fig. 1 and  
164 Supplementary Table 1). To avoid overlap of subjects between the CSF and PET cohorts, we  
165 used only datasets with genotype-level information available.

166

#### 167 **a. Ace Alzheimer Center Barcelona**

168 The Ace cohort comprised 1,189 individuals with brain amyloidosis measurements obtained  
169 using CSF or PET imaging, divided into three independent and non-overlapping cohorts.  
170 Because we used different methods to quantify CSF A $\beta$ 42, we decided to analyse the GWAS  
171 in two independent groups (536 individuals tested using Innotech ELISA kits and 472  
172 individuals tested using the Lumipulse automated platform<sup>17</sup>). We included a third dataset of  
173 181 individuals with subjective cognitive decline (SCD) tested using PET Florbetaben  
174 measures from the Fundació ACE Healthy Brain Initiative (FACEHBI) study<sup>18</sup>. The clinical  
175 protocols of the Ace Alzheimer Center have been previously published<sup>17-19</sup>. Briefly, syndromic  
176 diagnosis of all subjects was established by a multidisciplinary group of neurologists,  
177 neuropsychologists, and social workers. We assigned to healthy controls (HCs) including SCD  
178 diagnosis to Clinical Dementia Rating (CDR) of 0 individuals, and mild cognitive impairment  
179 (MCI) individuals a CDR of 0.5. For MCI diagnosis, the classification of López *et al.*, and  
180 Petersen's criteria were also used<sup>20-23</sup>. We employed the 2011 National Institute on Aging and  
181 Alzheimer's Association (NIA-AA) guidelines for AD diagnosis<sup>24</sup>. We performed a lumbar  
182 puncture (LP) to obtain CSF following consensus recommendations<sup>25</sup>. The CSF obtained was  
183 centrifuged (2000 x g for 10 min at 4°C) and stored at -80°C. For A $\beta$ 42 analysis, CSF was  
184 defrosted at room temperature (20°C), vortexed and protein levels measured using the  
185 commercial ELISA kit Innotech  $\beta$ -AMYLOID (1-42) in 536 individuals and the  
186 chemiluminescent enzyme-immunoassay LUMIPULSE G600II automated platform (Fujirebio

187 Europe, Belgium) in 472 individuals<sup>17</sup>. FACEHBI patients were assessed for brain amyloid  
188 deposition by PET imaging using the florbetaben [<sup>18</sup>F] radiotracer (FBB) (NeuraCeq©). A  
189 single slow intravenous bolus of 300 Mbq of FBB (6 sec/mL) (>10 mL during 20 min) was  
190 administered. After 90 min, PET images were acquired<sup>18</sup>.

191

### 192 **b. Valdecilla cohort for the study of memory and brain aging**

193 The Valdecilla cohort comprised 97 individuals who were older than 55 years and extensively  
194 phenotyped. Biological samples were collected at baseline and several tests were performed to  
195 evaluate early signs of AD. Moreover, core biomarkers in CSF were analysed and a  
196 neuropsychological battery including The Free and Cued Selective Reminding Test<sup>26</sup>, the  
197 Spanish version of the Face-Name Associative Memory Exam<sup>27</sup>, and the Logical Memory Test  
198 of the Wechsler Memory Scale-III<sup>28</sup> and depression symptoms by the Geriatric Depression  
199 Scale<sup>29</sup>. HC (CDR=0), MCI (CDR=0.1) and dementia individuals (NIA-AA guidelines) were  
200 included in this analysis<sup>30</sup>. In the Valdecilla cohort, the A $\beta$ 42 biomarker was quantified by  
201 Lumipulse G600II which were interpreted according to previously established cut-off points<sup>31</sup>.  
202 Further information about phenotype assessment was presented elsewhere<sup>32</sup>.

203

### 204 **c. Alzheimer's Disease Neuroimaging Initiative (ADNI) cohort**

205 Launched in 2003, ADNI is a longitudinal multicentre cohort for AD research based on United  
206 States and Canada<sup>33,34</sup>. The primary goal of ADNI has been to test whether biological markers,  
207 clinical and neuropsychological assessments can be combined to study the progression of MCI  
208 and early AD. We selected individuals from two separate ADNI databases: 1) the ADNI1  
209 cohort with 378 individuals with available A $\beta$ 42 in CSF and 2) the ADNI2GO cohort with 412  
210 individuals with available PET centiloid measures. In ADNI, syndromic diagnoses were based  
211 on a specific cut-off in the WMS-II LM test, education attainment, the Mini-Mental State Exam  
212 (MMSE) and CDR score. For HC and those with SCD, an MMSE score of 24–30 and a CDR  
213 of 0 were used. For those with MCI, a CDR of 0.5 and MMSE score of 24–30 were used. For  
214 those with AD, a CDR of 0.5–1 and an MMSE score of 20–26 were used. For the AD diagnosis,  
215 the National Institute of Neurological and Communicative Disorders and Stroke and  
216 Alzheimer's Disease and Related Disorders Association (NINCDS/ADRDA) criteria for  
217 *probable* AD were considered<sup>35</sup>. In ADNI individuals, A $\beta$ 42 CSF biomarker was measured  
218 using the Luminex xMAP platform (Luminex Corp, Austin, TX) for multiplexing with

219 Innogenetics immunoassay reagents (INNO-BIA AlzBio3, Ghent, Belgium)<sup>36,37</sup>. ADNI2GO  
220 patients were screened for brain amyloid deposits using the Florbetapir [<sup>18</sup>F] (AV45)  
221 radiotracer. After the injection of 370 MBq (10 mCi), four 5 min scans were acquired 50-70  
222 min after the injection<sup>36</sup>. Further information about PET data acquisition can be found  
223 elsewhere<sup>38</sup>.

224

## 225 **PET imaging acquisition, harmonization and analysis**

226 As FACEHBI and ADNI cohorts had different radiotracers, PET centiloid measures were used  
227 to perform a meta-analysis. Centiloids were calculated using equation (1), which was described  
228 for the conversion of FBB measures in the FACEHBI cohort<sup>39</sup> and equation (2), which was  
229 described for the conversion of AV45 in ADNI<sup>40</sup>.

$$230 \quad \text{Centiloid}_{\text{FACEHBI}} = (153.4 \times \text{SUVR}_{\text{FBB}}) - 154.9 \quad (1)$$

$$231 \quad \text{Centiloid}_{\text{ADNI}} = (196.9 \times \text{SUVR}_{\text{AV45}}) - 196.03 \quad (2)$$

232

## 233 **Genotyping, quality control and imputation**

234 Ace and Valdecilla DNA samples were genotyped using the Axiom 815K Spanish Biobank  
235 Array (Thermo Fisher). The genotyping was performed by the Spanish National Center for  
236 Genotyping (CeGen, Santiago de Compostela, Spain). Genotyping procedures have been  
237 previously published elsewhere<sup>5,19</sup>. For the ADNI samples, the Illumina Human610-Quad  
238 BeadChip platform was used for genotyping in ADNI1, and the Illumina HumanOmniExpress  
239 BeadChip was used for ADNI2GO<sup>41</sup>.

240 Common quality control was applied to all GWAS datasets. Briefly, individuals with low-  
241 quality samples, excess of heterozygosity, sample call rate below 97%, sex discrepancies,  
242 variants call rate below 95% or a deviation from the Hardy–Weinberg equilibrium ( $P > 1e-06$ )  
243 were excluded from the analysis. In addition, familial relatedness ( $\text{PI-HAT} > 0.1875$ ) or ancestry  
244 outliers based on principal component analysis (PCA) were also removed. The imputation was  
245 performed using the Haplotype Reference Consortium panel in the Michigan Imputation  
246 Server<sup>42</sup>. Only the common markers ( $\text{MAF} > 1\%$ ;  $\text{MAC} = 20$ ) and high imputation quality  
247 ( $R^2 > 0.3$ ) were selected for the subsequent analyses (GRCh37/hg19 reference assembly).



## 248 **SOMAscan Proteomic Assay**

249 A subset of 1,008 CSF samples (Ace CSF cohort) was analysed using the SOMAscan panel  
250 measuring more than 7,000 proteins (SomaLogic, Boulder, Colorado). Briefly, this multiplex  
251 proteomic assay uses a 50  $\mu$ L CSF sample and modified DNA aptamers to measure protein  
252 abundance. First, proteins are bound to immobilized aptamers using streptavidin beads and  
253 tagged with fluorescent markers. After washing unbound proteins, the streptavidin beads are  
254 released using ultraviolet light, and the protein–aptamer complex is re-captured by monomeric  
255 avidin. To select only specific complexes, the protein–aptamers are exposed to an anionic  
256 competitor and then, hybridized in a conventional DNA array for analysis as described in Gold  
257 *et al*<sup>43</sup>. Finally, the protein level measures expressed in relative fluorescent units (RFU) are  
258 normalized using the adaptive normalization by maximum likelihood method further described  
259 in Candia *et al*<sup>44</sup>.

260

## 261 **Statistical analysis**

262

### 263 **a. GWAS and meta-GWAS**

264 We harmonized CSF and PET endophenotypes measures performing a log<sub>10</sub> transformation to  
265 adjust to a normal distribution, and Z-score values were determined using the *scale* R function  
266 (*center*=TRUE, *scale*=TRUE) (Supplementary Fig. 2). We used R software version 4.1.1.

267 The GWAS on each dataset was run using a generalized linear model in the software PLINK2<sup>45</sup>.  
268 The statistical model considered population microstratification (four PCs), sex, age, and  
269 dementia status for the association analysis. We then performed an inverse-variance weighted  
270 meta-analysis on each amyloid burden endophenotype separately, A $\beta$ 42 (n=1,483) in CSF and  
271 amyloid PET imaging (n=593).

272 Thereafter, both A $\beta$  endophenotypes were further combined into a single meta-analysis  
273 (n=2,076) using the sample size weighted method in METAL software. This approach  
274 integrates p-values from different studies, weighting them by the sample size of each cohort,  
275 which provides a way to combine evidence across studies without relying on the effect size  
276 direction<sup>46</sup>. This is particularly useful when dealing with datasets where the effect sizes are not

277 directly comparable or when different methods are used to measure the same biological  
278 outcome, as is the case with PET and CSF amyloid measurements.

279 We chose this meta-analysis of p-values approach because the effect directions and methods  
280 applied to measure amyloid burden differ between PET and CSF assessments. Specifically, in  
281 AD, the two measurements exhibit opposite biological directions: decreased levels of CSF  
282 A $\beta$ 42 are associated with increased amyloid plaque deposition in the brain, as observed through  
283 PET imaging. PET measures amyloid burden through radiotracer retention, while CSF  
284 measures it through soluble A $\beta$ 42 levels, which decrease as amyloid plaques accumulate in the  
285 brain. Thus, directly comparing effect sizes across these methods could be misleading<sup>46,47</sup>.

286 By combining p-values, focusing on the statistical significance and opposite effect size  
287 direction, this approach accounts for the differing biological contexts and measurement  
288 techniques, enabling a more robust and generalized analysis of amyloid burden across different  
289 datasets. The genetic markers evaluated in the meta-analysis were filtered considering the  
290 opposite effect direction in each CSF and PET endophenotype-independent GWAS and its  
291 presence in at least half of the datasets to select SNPs for further analysis.

292 Additionally, we performed another CSF-PET meta-analysis considering the largest publicly  
293 available datasets for CSF A $\beta$ 42 (n=13,116)<sup>9</sup> and amyloid PET (n=13,409)<sup>48</sup> (publicly  
294 available datasets; PAD analysis). To homogenize the results with our primary analysis, those  
295 datasets were converted to the GRCh37 assembly using the UCSC LiftOver software<sup>49</sup>.  
296 Because we did not have access to genotype-level information for all cohorts included in these  
297 studies, we were unable to prune potential overlapping subjects between both meta-analyses.  
298 Therefore, the results of combining these large meta-GWAS should be interpreted cautiously  
299 and are considered primarily for generating additional evidence about the pathways observed  
300 in our main analysis, where subject overlap was checked at the genotype level and removed to  
301 create two genuinely independent datasets (CSF and PET).

302 Finally, we attempted to replicate previously published genes for AD described in Bellenguez  
303 *et al*<sup>4</sup>, the significant signals associated with amyloid burden reported by the EADB  
304 consortium<sup>9</sup> and significant markers associated with neuropathological features described in  
305 Beecham *et al*<sup>50</sup> (Supplementary Table 2, Supplementary Table 3, Supplementary Table 4, and  
306 Supplementary Material 1).

307

308       **b. Functional examination of identified sentinel SNPs and linked**  
309               **genomic regions**

310 Clumping and annotation of suggestive signals ( $P < 1e-05$ ) were performed using the software  
311 PLINK1.9<sup>51</sup>. Additional annotations of biological function and gene-mapping were performed  
312 using meta-analysis summary statistics using the online tool Functional Mapping and  
313 Annotation of Genome-Wide Association Studies (FUMA)<sup>52</sup>. We set the threshold for  
314 independent significant SNPs at  $P < 1e-05$ ,  $R^2 < 0.05$ , separated by over 250 kb, and we used the  
315 1000G Phase3 reference panel to analyse suggestive signals in European population. For  
316 functional annotation, SNPs were matched to available databases such as ANNOVAR,  
317 Combined Annotation Dependent Depletion (CADD) scores, RegulomeDB and chromatin  
318 states based on a hidden Markov model from the Roadmap Epigenomics Project. Significant  
319 hits were mapped to genes according to 3 methods: 1) Physical distance with a maximum of  
320 10 kb from nearby genes in the reference assembly, 2) expression quantitative trait *loci* (eQTL)  
321 associations assigned to SNP in blood, vascular, heart, brain tissues and embryonic stem cell  
322 derived cells, and 3) three-dimensional DNA interactions with SNPs and other gene regions  
323 where promoters were considered to be 250 bp upstream and 500 bp downstream of the  
324 transcription starting site for chromatin interaction. Moreover, a gene-based analysis was  
325 performed using MAGMA v1.08 that assigned exclusively protein-coding genes (Ensembl  
326 build 85) to the top SNPs found. Only 11,807 genes were mapped, and the gene-wide  
327 significance was defined at  $P = 0.05/11,807 = 4.235e-06$ . We also conducted FUMA annotations  
328 in the amyloid burden meta-analysis considering the largest meta-GWAS for amyloid PET and  
329 CSF reported to date<sup>9,48</sup>.

330

331       **c. Polygenic Risk Scores (PRS)**

332 We computed the AD PRS described in Bellenguez *et al* that considered 83 *loci*. However,  
333 some SNPs were not imputed or had a low imputation quality ( $R^2 < 0.3$ ), and we decided to  
334 calculate the AD PRS including genetic variants found in all imputed datasets ( $n = 76$ ;  
335 Supplementary Table 5). For PRS calculation, we added the gene dosages of these SNPs  
336 weighting by their effect size (beta coefficients); the allele analysed was matched to the  
337 reported allele (A1) by Bellenguez *et al*<sup>4</sup>. Because some control samples were included in the  
338 first stage of the AD GWAS, we considered the independent effects reported in the second  
339 stage for the PRS calculation. Additionally, due to the large effect on AD risk and its well-

340 established association with most AD endophenotypes, the *APOE locus* was excluded from all  
341 these PRS. We then tested its association with AD case-control status, CSF A $\beta$ 42 and p-tau  
342 endophenotypes, and PET amyloid burden measurements. We considered as a covariate the  
343 age, sex, and disease status only in associations with biomarkers. These analyses were  
344 performed separately in each cohort except for Valdecilla which was excluded due to reduced  
345 sample size, while Ace PET cohort was excluded in the case-control analysis because all  
346 individuals were cognitively unimpaired. Additionally, we considered the fixed effect meta-  
347 analysis model considering the heterogeneity threshold ( $I^2$ ) of 75% as high<sup>53</sup>.

348 We also calculated another PRS for A) AD<sup>4</sup> (n=76 SNPs; Supplementary Table 5), B) CSF  
349 A $\beta$ 42 levels (n=30 SNPs; Supplementary Table 6) considering the genetic variants with a  
350  $P < 1e-05$  described in Jansen *et al*<sup>9</sup>, and C) an amyloid burden PRS considering suggestive  
351 variants found in our meta-analysis (combining endophenotypes filtering according to the  
352 effect size direction; n=9 SNPs; Supplementary Table 7) in GR@ACE cohort individuals,  
353 including 8,110 cases and 9,640 controls the same way as described above. Further information  
354 about the cohort has been previously published<sup>5,19</sup>. For PRS computation, the effect (beta  
355 coefficients) and standard errors were estimated using the equations described by Zhu *et al*<sup>54</sup>.  
356 Again, we associated these scaled PRS with case-control data in non-overlapping individuals  
357 to assess if A $\beta$  genetic determinants are also related to disease risk.

358

#### 359 **d. Association between biomarker levels and SOMAscan proteomics**

360 We assessed the association between SOMAscan 7k proteomic panel and CSF A $\beta$ 42 levels  
361 (n=1,008) in the Ace CSF cohort. Briefly, SOMAscan proteomic measures were log10  
362 transformed, outliers were removed at  $\pm 3$  standard deviations from the mean and standardized  
363 using the scale R function with centring and scaling. For further analysis, we selected 2,682  
364 proteins based on correlations between: 1) two independent SOMAscan assay analysing the  
365 same samples, and 2) comparing aptamer- and antibody-based proteomic platforms<sup>55,56</sup>. To  
366 identify proteins associated to CSF A $\beta$ 42, a linear regression model was performed on scaled  
367 CSF A $\beta$ 42 levels and proteomic measures. We considered disease status, sex, age, and the CSF  
368 biomarker technique as covariates. Subsequently, the top 500 ranking of significant proteins  
369 associated with CSF A $\beta$ 42 (False discovery rate;  $FDR < 1.864e-05$ ) was analysed in the WEB-  
370 based GENE SeT AnaLysis Toolkit (WebGestalt)<sup>57</sup> to perform an over-representation analysis  
371 (ORA) considering several functional databases and the whole genome as built-in reference

372 gene list following the idea of investigating the complete genome (GWAS and gene-based  
373 analyses) (Supplementary Table 8). We also performed an enrichment analysis on the complete  
374 subset of valid SOMAscan proteins (n=2,682) to evaluate the impact of platform analyte  
375 preselection and quality control process on the results obtained.

376 To explore the biological significance of the GWAS results, we displayed the overlap between  
377 *loci* controlling amyloidosis and the proteins significantly associated with CSF A $\beta$ 42 in the  
378 Ace CSF cohort using Venn diagrams. The top 500 proteome and genome hits selected from  
379 the CSF A $\beta$ 42 meta-GWAS described in Jansen *et al*, the meta-analysis of CSF-PET  
380 endophenotypes filtered by opposite effect size direction, and the gene-based MAGMA  
381 analysis performed by FUMA were identified and annotated. The top rankings were reduced  
382 to 345, 339, 457, 361 and 465 *loci* for the meta-GWAS by Jansen *et al*, our current CSF-PET  
383 meta-analysis and its gene-based MAGMA analysis, the PAD CSF-PET meta-GWAS and its  
384 gene-based MAGMA analysis<sup>9,48</sup>, respectively. These reductions were due to the presence of  
385 SNPs that were not annotated and could not be matched to UniProt codes (Supplementary  
386 Table 9, Supplementary Table 10, Supplementary Table 11, Supplementary Table 12 and  
387 Supplementary Table 13). The top rankings were compared and the overlap between genomic  
388 and proteomic analysis was identified and evaluated using WebGestalt tool as described above.

389

## 390 **Results**

### 391 **Meta-analysis of A $\beta$ endophenotypes**

392 The genome-wide meta-analysis of CSF endophenotypes involved 4 independent AD cohorts  
393 with A $\beta$ 42 measures (n=1,483;  $\lambda$ =1.009). The genomic inflation factor ( $\lambda$ ) suggested no gross  
394 bias or stratification. As it was expected, we observed a consistent genome-wide significant  
395 association with rs429358-*APOE locus* as a sentinel variant (Effect=-0.58 [-0.658, -0.503]; P=  
396 8.36e-49). We detected 19 additional suggestive pQTL signals for A $\beta$ 42 levels in CSF  
397 (Supplementary Table 14). Similarly, the meta-analysis of amyloid PET endophenotype  
398 (n=593;  $\lambda$ =1.013), revealed a genome-wide significant association in the same sentinel variant  
399 in the opposite direction (rs429358-*APOE locus*; Effect=0.684 [0.555, 0.813]; P= 2.00e-25).  
400 An additional novel hit at rs72737013 close to the *ANXA1* gene (Effect=0.813 [0.528, 1.099];  
401 P=2.39e-08) was detected. This gene is related to anti-inflammatory reactions, innate immune

402 response, and inflammatory processes<sup>58</sup>, psychiatric disorders, brain volume<sup>59,60</sup>, and the  
403 degradation of A $\beta$  species<sup>61</sup>. Additionally, there were 43 additional independent suggestive  
404 signals annotated for amyloid burden measured using PET (Supplementary Table 15).

405 We combined the summary statistics from both CSF and PET A $\beta$  meta-analyses without  
406 considering the effect direction (n=2,076). Again, we confirmed the sentinel variant rs429358  
407 to be the most significant *locus* in the *APOE* region. Other genetic variants emerged as GWAS-  
408 significant in this new meta-analysis. However, none of them were inversely associated with  
409 CSF and PET endophenotypes in all studies except for the rs429358-*APOE* marker. We  
410 considered these hits as false positive signals (Supplementary Table 16).

411 In looking for new suggestive signals beyond *APOE*, we extracted the subset of 376,599 SNPs  
412 with consistent opposite effect in CSF and PET analyses. After the SNP selection in the  
413 combined A $\beta$  meta-analysis, the rs429358-*APOE* variant (P=9.50e-67) remained as the only  
414 GWAS-significant hit (Fig. 1A, upper) but nine additional suggestive consistent variants were  
415 identified in genes such as *NPY5R*, *TIAM2* or *MAGI2*, among others (Table 1). Additionally,  
416 the combination of A $\beta$  endophenotypes enhanced the significant replication of several genetic  
417 markers previously described for AD<sup>4</sup>, CSF A $\beta$ 42 levels<sup>9</sup> and neuropathological features<sup>50</sup>  
418 (Supplementary Material 1, Supplementary Table 2, Supplementary Table 3, Supplementary  
419 Table 4).

420 However, the PAD CSF-PET meta-analysis<sup>9,48</sup> (effective sample size n=23,532) identified  
421 several markers previously associated with AD and its endophenotypes. These significant  
422 markers were identified on chromosome 19 including the rs429358-*APOE* (P=5.94e-601), as  
423 well as, the rs4844610-*CRI* (P=5.76e-18), rs7982-*CLU* (P=7.81e-11), rs12151021-*ABCA7*  
424 (P=3.92e-10), rs6733839-*BINI* (P=1.02e-08), rs117834516-*FERMT2* (P=4.82e-08) and the  
425 novel rs4955351-*GADLI* (P=3.19e-08) which was not previously associated to AD or amyloid  
426 levels (Fig. 1A lower, Supplementary Table 17). Additionally, the PAD analysis replicated the  
427 rs115822934-*NPY5R* variant (P=3.21e-04) originally found suggestive in our CSF-PET meta-  
428 analysis (Supplementary Table 18). Importantly, we also observe concordances between our  
429 local effort (amyloid burden CSF-PET meta-GWAS) and the PAD. Specifically, we detected  
430 15 overlapping sentinel markers in the top 500 ranking of the amyloid burden meta-GWAS  
431 from both the PAD and our current meta-analysis (Fig.1B), as well as 67 overlapping genes in  
432 the PAD and our gene-based top 500 ranking (Fig.1C).

433 To link the variants of interest to specific genes and obtain relevant functional information  
434 about these *loci*, we applied FUMA to the suggestive signals from the A $\beta$  meta-analysis that  
435 were filtered based on opposite direction in CSF and PET (Table 1). There were 125 prioritized  
436 genes mapped using at least two strategies (positional mapping, eQTL or chromatin  
437 interactions) and 45 genes were selected based on the three strategies described in methods. As  
438 expected, the majority of the prioritized genes were related to the rs429358-*APOE*. Excluding  
439 chromosome 19, we prioritized 23 genes mapped (6 SNPs) with a CADD score > 12.37  
440 suggesting a potential deleterious effect (Supplementary Table 19)<sup>62</sup>. In contrast to the  
441 univariate SNP analysis, the gene-based analysis performed using MAGMA revealed 15 study-  
442 wise significant *loci* ( $P < 4.235e-06$ ) excluding the *APOE* region (Table 2, Supplementary Fig.  
443 3). Interestingly, the identified genetic variants in some of these genes (*TENM3*, *TMEM132D*,  
444 *PTPRD*, *CNTN5*, *RBFOX1*, *CSMD1*, *TIAM2*, *RORA* and *WWOX*) have been previously related  
445 to neuroimaging endophenotypes<sup>63–65</sup>, extreme AD PRS measures<sup>66</sup>, AD endophenotypes (CSF  
446 A $\beta$ 42 or p-tau levels<sup>13,67–70</sup>), mental disorders<sup>71,72</sup> and cognitive decline in AD<sup>64,73,74</sup>.  
447 Additionally, the gene-based analysis of the PAD amyloid burden meta-GWAS revealed genes  
448 previously associated to AD such as *APOE* ( $P = 2.09e-13$ ), *CLU* ( $P = 2.13e-07$ ), *FERMT2*  
449 ( $P = 3.49e-07$ ) and the *CRI* locus ( $P = 3.64e-06$ ), which reached borderline gene-wide  
450 significance threshold at  $P < 2.717e-06$  (Supplementary Table 20).

451

## 452 **Association between AD PRS with AD endophenotypes and other** 453 **clinical features**

454 We observed a significant result in the meta-analysed associations between the AD PRS and  
455 A $\beta$  levels (CSF Effect = -0.05 [-0.10, -0.00];  $P = 3.43e-02$  and PET Effect = 0.10 [0.02, 0.17];  
456  $P = 1.30e-02$ ). These results suggest that genes involved in AD risk indeed modulate amyloid  
457 levels (Fig. 2A, Fig. 2B).

458 As expected, we observed a significant result in the association meta-analysis of the AD PRS  
459 with case-control dementia status in all 3 endophenotype datasets (OR=1.18 [1.05, 1.32];  
460  $P = 5.29e-03$ ). These results suggest that these genes modulate the disease status as previously  
461 reported<sup>4</sup> (Fig. 3). Even though ADNI2GO did not reach statistical significance, it had a similar  
462 effect size and direction, possibly due to the low proportion of AD cases in this cohort (6.55  
463 %).

## 464 **Association between genetic variants of amyloid endophenotypes** 465 **with case-control status**

466 To assess whether CSF A $\beta$ 42 genetic modulators are also related to AD risk, we constructed  
467 different PRS including variants detected in our study and previous meta-GWAS<sup>4</sup>. We then  
468 checked the association of calculated PRS in the GR@ACE case-control study<sup>5</sup>. We did not  
469 observe any significant association for any calculated PRS for amyloid (Fig. 4) which could be  
470 due to the reduced set of independent markers reported for these phenotypes ( $P < 1e-05$ ) or not  
471 having an impact on AD pathology. As expected, the AD PRS was highly associated with the  
472 case-control (OR=1.35 [1.30, 1.40];  $P = 3.02e-49$ ), thus confirming that the AD genes  
473 previously described by us and the EADB consortium<sup>4,5</sup> truly modulate disease risk in the  
474 GR@ACE/DEGESCO cohort.

475

## 476 **CSF proteome signatures associated with the A $\beta$ 42 CSF levels**

477 We regressed the CSF A $\beta$ 42 peptide levels on CSF SOMAscan aptamer levels to identify the  
478 proteomic signature associated with amyloid burden (Fig. 5A). We identified 1,387 study-wide  
479 significant proteins in the linear model of CSF A $\beta$ 42 ( $FDR < 1.864e-05$ ) (Supplementary Table  
480 21). Notably, we observed a marked asymmetry in the effect of SOMAmers on CSF A $\beta$ 42  
481 levels, with the majority showing estimates greater than 0, suggesting a positive correlation  
482 contributing to increased CSF A $\beta$ 42 levels (Fig. 5A). Thus, the top 100 ranks of significant  
483 associations have an estimate range between 0.449 and 0.317, which contributes to an increase  
484 of this magnitude in CSF A $\beta$ 42 levels, and the variance explained by these highly associated  
485 proteins ranges of between 0.202 and 0.297. Importantly, we observed multiple proteins that  
486 have been associated with the CSF levels of A $\beta$  species or its mechanisms in previous studies,  
487 such as MTMR7, LMOD4, GD3S, SERA/PHGDH, SELS, ATE1, NPTXR, and the 14-3-3 eta  
488 protein, among others<sup>75-81</sup>.

489 An enrichment analysis performed for significant proteins associated with CSF A $\beta$ 42 levels  
490 revealed genes involved in *neuronal projection guidance* (enrichment ratio=11.034;  
491  $FDR < 2.2e-16$ ), *synaptic structure and activity* (enrichment ratio=10.868;  $FDR < 2.2e-16$ ), *cell–*  
492 *cell adhesion by plasma membrane molecules* (enrichment ratio=7.660;  $FDR < 2.2e-16$ ),  
493 *peptidyl-tyrosine modifications* (enrichment ratio=6.174;  $FDR < 2.2e-16$ ), *regulation of cell*  
494 *morphogenesis* (enrichment ratio=5.786;  $FDR < 2.2e-16$ ) and *angiogenesis* (enrichment



495 ratio=5.617; FDR<2.2e-16) which are mainly driven by the large proportion of proteins with a  
496 positive effect (n=1,300; 93.73%) (Fig. 5B; Supplementary Table 22, Supplementary Table  
497 23). Furthermore, when comparing the enrichment results from the ORA analysis between the  
498 entire set of valid SOMAscan proteins and the proteins significantly associated with A $\beta$ 42  
499 levels, we observed a complete lack of overlap, reinforcing the validity of our findings  
500 (Supplementary Fig. 4).

501 To identify those genes that were commonly associated with CSF A $\beta$ 42 levels in genomic and  
502 proteomic analyses, we compared the top 500 common list of signals in the following four  
503 analyses: meta-GWAS by EADB<sup>4</sup>, our meta-analysis of CSF-PET, gene-based MAGMA, and  
504 SOMAscan protein analysis. We found three genes/proteins (*CHST1*, *PTPRD* and  
505 *TMEM132D*) present in all four analyses, representing only 0.2% of the total *loci*/proteins  
506 analysed (full overlap). In addition, 32 other proteins overlapped between the SOMAscan  
507 proteomics and any genomic analysis, including four proteins represented in 3 different  
508 analyses (Fig. 6A, Supplementary Table 24). Similar results were obtained in investigating the  
509 top rankings of the SOMAscan analysis, the PAD CSF-PET meta-GWAS and its gene-based  
510 analysis; only the *TMEM132D* was represented in all analyses (Fig. 6B). Interestingly, we  
511 found that 10 of the 23 *loci*/proteins observed were also overlapping with the ranking  
512 considering our main CSF-PET meta-GWAS results. This overlapping with PAD CSF-PET  
513 meta-GWAS support the validity of our approach (Supplementary Fig. 5, Supplementary Table  
514 25). However, there was a reduced consistency between the top 500 SOMAscan proteins  
515 associated with CSF A $\beta$ 42 and any genomic results with less than 2.5% of overlapping  
516 proteins. These results suggest that the A $\beta$ 42-related protein signature in CSF might not be  
517 closely linked to amyloid genetic modulators, indicating that the proteome signature associated  
518 with A $\beta$ 42 burden in the brain primarily reflects general disease processes largely unrelated to  
519 the genetic elements controlling amyloid production.

520 Finally, to gain insight into the few commonalities identified by comparing genetic and  
521 proteome signatures associated to the amyloid burden in the brain, we conducted a new  
522 enrichment analysis. Despite the reduced overlapping hits among proteome and genome  
523 studies, several significant mechanisms related to the *synthesis of glycosylphosphatidyl inositol*  
524 (*GPI*)-anchored proteins by post-translational modifications were identified (enrichment  
525 ratio=48.070; FDR=1.86e-04) and the anchored component of the membrane (enrichment  
526 ratio=31.778; FDR=1.32e-04), cell-cell adhesion via plasma membrane molecules  
527 (enrichment ratio=26.207; FDR=3.42e-06), mental disorders (enrichment ratio=12.853;

528 FDR=3.42e-06) such as *autism* (enrichment ratio=18.556; FDR=0.002) and *anxiety*  
529 (enrichment ratio=23.524; FDR=0.004), and *regulation and development of neuron projections*  
530 (enrichment ratio=13.035; FDR=0.002) among others (FDR<0.05). Interestingly, six of these  
531 mechanisms were also represented in the enrichment analysis of the PAD CSF-PET meta-  
532 analysis, which confirms our main results (Fig. 6C, Supplementary Table 26, Supplementary  
533 Table 27, Fig.6D, Supplementary Table 28, Supplementary Table 29).

534

## 535 Discussion

536 For the first time, we have combined meta-GWAS results obtained from analysing amyloid  
537 PET and CSF A $\beta$ 2 levels. Our innovative experimental approach identified novel genetic  
538 variants associated with amyloid burden endophenotypes. This meta-analytic approach  
539 benefited from combining endophenotypic information from six cohorts thereby increasing our  
540 statistical power. As expected, we identified a genome-wide significant hit at the rs429358-  
541 *APOE* loci. We also observed a novel genome-wide significant hit near the *ANXA1* locus  
542 exclusively associated with PET amyloid. SNPs in this locus were previously linked to  
543 psychiatric disorders, brain volume<sup>59,60</sup>, and the degradation of A $\beta$  species<sup>61</sup>. However, neither  
544 the large PET meta-GWAS available nor the PAD meta-analysis conducted by us replicated  
545 this finding. For these reasons, we believe that this signal could be a false positive. We attribute  
546 the lack of additional hits to the relatively small sample size of our CSF-PET meta-GWAS. By  
547 repeating this strategy with a larger sample size, we expect to identify more genetic modulators  
548 of A $\beta$ 2 peptide expression in the brain. Indeed, using a similar approach with currently  
549 available summary statistics (PAD study), we were able to detect several sentinel markers  
550 surpassing the GWAS significance threshold. Specifically, the PAD CSF-PET meta-analysis  
551 identified several significant genes that have been previously related to AD (*CRI*, *BINI*, *CLU*,  
552 *ABCA7*, *FERMT2* and *APOE*<sup>4,82-85</sup>) or amyloid proteins (*CRI*, *CLU*, *APOE* and  
553 *FERMT2*<sup>9,86,87</sup>), as well as *PICALM* and *GPC5* suggestive genes<sup>84,88</sup>. Notably, we identified  
554 the novel *GADLI* locus, which encodes for a protein from the glutamate decarboxylase family,  
555 suggesting that it might have a glutamate decarboxylase activity in the CNS<sup>89,90</sup>.

556 In AD, the glutamate excess generates a continuous glutamatergic activity, impairing neuronal  
557 plasticity and long-term potentiation leading to excitotoxicity. Therefore, using receptor

558 antagonists such as memantine, which has shown neuroprotective effects, could be a crucial  
559 therapeutic intervention<sup>91,92</sup>.

560 Importantly, these results should be interpreted with extreme caution because PAD analysis is  
561 not entirely independent as various cohorts were represented in both summary statistics of the  
562 PAD analysis (Supplementary Table 30). This overlapping samples (11.284%) could lead to  
563 overestimated effects and increased proportion of false positive findings. Compared to our local  
564 effort, where we eliminated any potential overlap between CSF and PET cohorts, we remain  
565 very cautious about the PAD results due to the potential overlap of subjects among studies.  
566 Future efforts are necessary to confirm the findings from the PAD analysis. Nevertheless, the  
567 PAD analysis replicated the rs115822934-*NPY5R* marker, alongside the rs429358-*APOE*,  
568 originally identified in our CSF-PET meta-analysis. These results might suggest that *NPY5R*  
569 could be genuinely involved in amyloid pathology, as well as panic disorders<sup>93,94</sup>. Again,  
570 further completely independent studies, expanding the sample size of these analysis, are needed  
571 to validate our observation and working hypothesis.

572 In spite of these limitations, our experimental strategy permitted us to evaluate common  
573 pathways potentially associated to CSF-soluble A $\beta$ 42 (circulating amyloid)<sup>95</sup> and brain  
574 amyloid species detected by PET (insoluble species such as amyloid plaques or cerebral  
575 amyloid angiopathy)<sup>96</sup> and proteome signature associated to CSF A $\beta$ 42 peptide levels. To  
576 assess the relationship between genetic modulators and protein levels, we analysed the overlap  
577 between *loci*-controlling amyloid levels and significant proteins associated with CSF A $\beta$ 42  
578 levels. Importantly, three genes/proteins (*CHST1*, *PTPRD* and *TMEM132D*) were identified  
579 and prioritized in all analyses, thus suggesting that these modulators might be key drivers  
580 controlling amyloid pathology. Lower *TMEM132D* levels have been observed in patients with  
581 frontotemporal dementia<sup>97</sup>, and genetic markers in this gene have been related to anxiety, panic  
582 disorders and the rate of cognitive decline<sup>73,98,99</sup>. This locus was the only that also overlapped  
583 with all PAD rankings, suggesting that might be a potential modulator of amyloid pathology.  
584 The *PTPRD* gene, which was also represented in the large meta-GWAS gene-based ranking,  
585 has been significantly associated to synaptic process in schizophrenia<sup>100</sup>, AD susceptibility,  
586 neurofibrillary tangle and neuritic plaques<sup>68</sup>. We consider these two *loci* excellent candidates  
587 for further translational research due to their consistent statistical significance and previous  
588 literature findings. Nevertheless, there is a possibility that we are not capturing pathological  
589 mechanisms occurring similarly in both biofluids due to the opposite direction filtering, which  
590 could be contributing to the accumulation or reduction in both CSF and PET amyloid levels.

591 These discordances have been described in previous articles<sup>101–103</sup>, suggesting that they might  
592 be caused due to the differential sensitivity to amyloid species across the AD continuum.  
593 Further research is needed to elucidate the role of these common and discordant amyloid  
594 mechanisms occurring in brain and their impact on disease development.

595 In this study, we found a limited overlap between genetic modulators of amyloid burden and  
596 the proteins associated with the CSF levels of A $\beta$ 42. This could be interpreted as a result of the  
597 inherent statistical noise in these multiomic analyses, the lack of power in our main analysis,  
598 or it could indicate that the observed discordance is genuine. The poor heritability reported for  
599 CSF traits in previous studies<sup>9</sup> supports that common SNPs might not strongly modulate the  
600 CSF amyloid burden. Moreover, no amyloid PRS showed a significant association with the  
601 risk of developing AD, whereas the AD PRS showed a strong association with the AD case-  
602 control status and amyloid levels, which is fully consistent with previous studies<sup>70,104–106</sup>. These  
603 results suggest either a lack of statistical power to detect genuine hits associated with amyloid  
604 burden or a limited causal role of common genetic modulators of amyloid deposits in the  
605 aetiology of clinical AD. Further studies are needed to clarify these discrepancies. Interestingly,  
606 we observed a higher number of *loci*/proteins overlapped with the SOMAscan protein  
607 associations with CSF A $\beta$ 42 levels and the gene-based analysis than in the sentinel SNP-based  
608 GWAS analyses (our meta-analysis n=21). The gene-based approach could be particularly  
609 powerful because the genetic markers summarised at (protein-coding) gene level might reduce  
610 the statistical noise on a full GWAS dataset<sup>52</sup>.

611 We also noted a large number of significant CSF SOMAscan proteins associated with CSF  
612 A $\beta$ 42 levels. Notably, most of the observed associations were predominantly positive in our  
613 study. Interestingly, Bader *et al*<sup>107</sup> reported a correlation map illustrating high correlations  
614 between CSF proteomic measures suggesting that these measures might lead to multiple  
615 significant associations. The massive abundance of significant proteins might simply reflect a  
616 general neurodegenerative signature that occurs as a result of widespread neuronal cell death  
617 or reactive gliosis. These changes are likely to be epiphenomenal rather than specific to the AD  
618 process. The potential implication of these findings is important for interpreting CSF proteome  
619 results. Indeed, only a minority of proteomic markers associated to A $\beta$ 42 might be genuine  
620 mediators modulating the AD-related amyloid endophenotype. Overall, the lack of overlap  
621 between A $\beta$ 42 and AD risk GWAS studies suggests that genetic factors modulating amyloid  
622 production may represent only a relatively small component of overall AD causality. These  
623 findings are also in line with several clinical trials targeting amyloid, that have observed a

624 reduced association between A $\beta$  reduction and AD progression, as well as only modest control  
625 of AD progression with these monotherapies. This also suggests that both amyloid-dependent  
626 and amyloid-independent mechanisms must be addressed simultaneously to effectively control  
627 disease progression<sup>108,109</sup>.

628 Despite the poor overlap, we detected 35 overlapping genes and proteins pointing to a few  
629 enriched mechanisms in our CSF-PET meta-GWAS. We consider these overlapping signals of  
630 special importance because they could point to genuine amyloid-related mechanisms involved  
631 in AD causality and development. We found A $\beta$  burden significantly associated with pathways  
632 controlling the anchored proteins in the membrane, which had also been represented in the  
633 PAD enriched analysis (n=23 loci/proteins). Interestingly, six enriched mechanisms were  
634 represented in both overlapping loci/protein rankings of the PAD and our CSF-PET meta-  
635 analysis. These results validate our findings and suggest that the enrichment analysis is more  
636 powerful in detecting genuine associations than analysing individual genes, particularly in the  
637 context of reduced statistical power.

638 Additionally, the enrichment analysis pointed to synapse molecules and cell adhesion  
639 mechanisms. Neuronal cadherins and integrins have been linked to the synaptic process,  
640 plasticity and long-term potentiation and modulation of A $\beta$  levels<sup>110</sup>, while their loss has been  
641 correlated to cognitive decline<sup>111–113</sup>. Furthermore, we detected a link between amyloid levels  
642 and mental disorders, such as anxiety which has been associated with high A $\beta$  deposition across  
643 the AD continuum<sup>114–116</sup>. On the contrary, autism spectrum disorder (ASD) has been associated  
644 with A $\beta$  processing via the non-amyloidogenic pathway leading to reduced A $\beta$  levels in ASD  
645 patients<sup>117</sup>. Other overlapping *loci* and proteins such as *ROBO2*, *CNTN5*, *OPCML*, *NRG3*,  
646 *NGFR* or *CACNA2D3*, have been associated with cognitive performance<sup>118,119</sup>, age at  
647 onset<sup>120,121</sup>, schizophrenia<sup>122–124</sup> or ASD<sup>125,126</sup>, AD<sup>127,128</sup> and its endophenotypes<sup>129,130</sup>.

648 Considering all these observations, it is difficult to conceive that all of them can be explained  
649 by pure random chance. However, our analysis had important limitations. First, we use a  
650 suboptimal p-value-based meta-analysis method, however, this strategy becomes highly  
651 valuable for integrating diverse studies reporting different estimate metrics and combining  
652 endophenotypes measured by various techniques<sup>131,132</sup>. Also, the CSF-PET meta-analysis did  
653 not report effect size which were estimated. The restrictive SNP filtering allowed the evaluation  
654 of only 4.9% of genomic markers, likely due to meta-analysing multiple datasets and reducing  
655 marker identification involved in common mechanisms between soluble-CSF and insoluble-

656 PET amyloid species. Moreover, as mentioned earlier, the PAD analysis was not completely  
657 independent, with an 8.272% and 3.073% of overlapping samples between our main meta-  
658 analysis, the CSF<sup>9</sup> and PET<sup>48</sup> summary statistics, respectively. The PAD CSF-PET meta-  
659 analysis should be interpreted with extreme caution due to these overlapping samples among  
660 summary statistics. Because we used publicly available results, we could not confirm the  
661 presence of additional overlapping samples, potentially leading to overfitting. The Ali *et al*  
662 meta-GWAS conducted a different data harmonisation process, potentially introducing  
663 variability. Furthermore, neuropathological information was not available for these samples,  
664 leaving us unaware of other concomitant pathological changes. Finally, the lack of significant  
665 findings for several PRS associations may suggest that there is insufficient statistical power to  
666 find genetic variants that affect the amyloid endophenotype. These concerns should be  
667 addressed in future research.

668 In summary, our results demonstrate the feasibility of combining A $\beta$  endophenotypes in CSF  
669 and PET, along with proteome analysis, to gain novel insights into the fundamental biology of  
670 AD. The strong proteomic associations with A $\beta$  endophenotypes could help identify signalling  
671 pathways and molecular mechanisms involved in A $\beta$  and AD pathology, as well as the  
672 overlapping pathways that control the amyloidotic process. Further studies are needed to refine  
673 these observed associations, connecting AD *loci* and proposed causal pathways with brain  
674 amyloidogenesis.

675

## 676 **Declarations**

### 677 **Ethics approval and consent to participate**

678 In accordance with Spanish regulations for the biomedical research field, all the protocols of  
679 this study were approved by the Clinical Research Ethics Commission of the Hospital Clinic  
680 (Barcelona, Spain) for Ace cohort and the Clinical Research Ethics Commission of Cantabria  
681 (Spain) for Valdecilla cohort. This research followed the Declaration of Helsinki. All  
682 participants were informed about the procedures and objectives of this study by a neurologist  
683 before signing an informed consent. Moreover, data confidentiality and privacy of patients  
684 were protected as specified in applicable laws.

685

## 686 Acknowledgments

687 We would like to thank patients and controls who participated in this project. The present work has been performed  
688 as part of the doctoral thesis of RPF at the University of Barcelona (Barcelona, Spain). Some control samples and  
689 data from patients included in this study were provided in part by the National DNA Bank Carlos III  
690 (www.bancoadn.org, University of Salamanca, Spain) and Hospital Universitario Virgen de Valme (Sevilla,  
691 Spain); they were processed following standard operating procedures with the appropriate approval of the Ethical  
692 and Scientific Committee. Data used in this article were obtained from the Alzheimer's Disease Neuroimaging  
693 Initiative (ADNI) database (adni.loni.usc.edu). As such, the investigators within the ADNI contributed to the  
694 design and implementation of ADNI and/or provided data but did not participate in analysis or writing of this  
695 report. A complete listing of ADNI investigators can be found at: [http://adni.loni.usc.edu/wp-](http://adni.loni.usc.edu/wp-content/uploads/how_to_apply/ADNI_Acknowledgement_List.pdf)  
696 [content/uploads/how\\_to\\_apply/ADNI\\_Acknowledgement\\_List.pdf](http://adni.loni.usc.edu/wp-content/uploads/how_to_apply/ADNI_Acknowledgement_List.pdf). Data was used for this project of which  
697 collection and sharing was funded by the Alzheimer's Disease Neuroimaging Initiative (ADNI) (National  
698 Institutes of Health Grant U01 AG024904) and DOD ADNI (Department of Defense award number W81XWH-  
699 12-2-0012). ADNI is funded by the National Institute on Aging, the National Institute of Biomedical Imaging and  
700 Bioengineering, and through generous contributions from the following: AbbVie, Alzheimer's Association;  
701 Alzheimer's Drug Discovery Foundation; Araclon Biotech; BioClinica, Inc.; Biogen; Bristol-Myers Squibb  
702 Company; CereSpir, Inc.; Cogstate; Eisai Inc.; Elan Pharmaceuticals, Inc.; Eli Lilly and Company; EuroImmun;  
703 F. Hoffmann-La Roche Ltd and its affiliated company Genentech, Inc.; Fujirebio; GE Healthcare; IXICO Ltd.;  
704 Janssen Alzheimer Immunotherapy Research & Development, LLC.; Johnson & Johnson Pharmaceutical  
705 Research & Development LLC.; Lumosity; Lundbeck; Merck & Co., Inc.; Meso Scale Diagnostics, LLC.;  
706 NeuroRx Research; Neurotrack Technologies; Novartis Pharmaceuticals Corporation; Pfizer Inc.; Piramal  
707 Imaging; Servier; Takeda Pharmaceutical Company; and Transition Therapeutics. The Canadian Institutes of  
708 Health Research is providing funds to support ADNI clinical sites in Canada. Private sector contributions are  
709 facilitated by the Foundation for the National Institutes of Health (www.fnih.org). The grantee organization is the  
710 Northern California Institute for Research and Education, and the study is coordinated by the Alzheimer's  
711 Therapeutic Research Institute at the University of Southern California. ADNI data are disseminated by the  
712 Laboratory for Neuro Imaging at the University of Southern California.

713

### 714 **The GR@ACE study group**

715 Nuria Aguilera<sup>1</sup>, Emilio Alarcon<sup>1</sup>, Montserrat Alegret<sup>1,3</sup>, Mercè Boada<sup>1,3</sup>, Mar Buendia<sup>1</sup>, Amanda Cano<sup>1,3</sup>, Pilar  
716 Cañabate<sup>1,3</sup>, Angel Carracedo<sup>5,33</sup>, Arturo Corbatón-Anchuelo<sup>23</sup>, Itziar de Rojas<sup>1,3</sup>, Susana Diego<sup>1</sup>, Ana  
717 Espinosa<sup>1</sup>, Anna Gailhagenet<sup>1</sup>, Pablo García-González<sup>1,3</sup>, Marina Guitart<sup>1</sup>, Antonio González-Pérez<sup>32</sup>, Marta  
718 Ibarria<sup>1</sup>, Asunción Lafuente<sup>1</sup>, Juan Macias<sup>22</sup>, Olalla Maroñas<sup>5</sup>, Elvira Martín<sup>1</sup>, Maria Teresa Martínez  
719 Larrad<sup>23,26</sup>, Marta Marquí<sup>1,3</sup>, Laura Montreal<sup>1</sup>, Sonia Moreno-Grau<sup>1,3</sup>, Mariona Moreno<sup>1</sup>, Raúl Nuñez-  
720 Llaves<sup>1</sup>, Clàudia Olivé<sup>1</sup>, Adelina Orellana<sup>1</sup>, Gemma Ortega<sup>1,3</sup>, Ana Pancho<sup>1</sup>, Ester Pelejà<sup>1</sup>, Alba Pérez-  
721 Cordon<sup>1</sup>, Juan A Pineda<sup>16</sup>, Raquel Puerta<sup>1,2</sup>, Silvia Preckler<sup>1</sup>, Inés Quintela<sup>5</sup>, Luis Miguel Real<sup>22,16</sup>, Maitee  
722 Rosende-Roca<sup>1</sup>, Agustín Ruiz<sup>1,3</sup>, Maria Eugenia Sáez<sup>32</sup>, Angela Sanabria<sup>1,3</sup>, Manuel Serrano-Rios<sup>23</sup>, Oscar  
723 Sotolongo-Grau<sup>1</sup>, Luís Tárrega<sup>1,3</sup>, Sergi Valero<sup>1,3</sup>, Liliana Vargas<sup>1</sup>

724 <sup>1</sup>Research Center and Memory Clinic. Ace Alzheimer Center Barcelona – Universitat Internacional de Catalunya,  
725 Spain. <sup>2</sup>Universitat de Barcelona (UB). <sup>3</sup>CIBERNED, Network Center for Biomedical Research in  
726 Neurodegenerative Diseases, National Institute of Health Carlos III, Madrid, Spain. <sup>5</sup>Grupo de Medicina  
727 Xenómica, Centro Nacional de Genotipado (CEGEN-PRB3-ISCIII). Universidade de Santiago de Compostela,  
728 Santiago de Compostela, Spain. <sup>16</sup>Departamento de Especialidades Quirúrgicas, Bioquímica e Inmunología.  
729 School of Medicine. University of Malaga. Málaga, Spain. <sup>22</sup>Unidad Clínica de Enfermedades Infecciosas y  
730 Microbiología.Hospital Universitario de Valme, Sevilla, Spain. <sup>23</sup>Instituto de Investigación Sanitaria del Hospital  
731 Clínico San Carlos (IdISSC), Hospital Clínico San Carlos. <sup>26</sup>Centro de Investigación Biomédica en Red de  
732 Diabetes y Enfermedades Metabólicas Asociadas (CIBERDEM). <sup>32</sup>CAEBI, Centro Andaluz de Estudios  
733 Bioinformáticos, Sevilla, Spain. <sup>33</sup>Fundación Pública Galega de Medicina Xenómica – CIBERER-IDIS, Santiago  
734 de Compostela, Spain.

735

### 736 **DEGESCO consortium**

737 Astrid Daniela Adarmes-Gómez<sup>28,3</sup>, Miquel Aguilar<sup>36,37</sup>, Nuria Aguilera<sup>1</sup>, Emilio Alarcón-Martín<sup>1</sup>, Daniel  
738 Alcolea<sup>31,3</sup>, Montserrat Alegret<sup>1,3</sup>, María Dolores Alonso<sup>38</sup>, Ignacio Alvarez<sup>36,37</sup>, Victoria Álvarez<sup>20,21</sup>, Guillermo  
739 Amer-Ferrer<sup>39</sup>, Martirio Antequera<sup>40</sup>, Anna Antonell<sup>30</sup>, Carmen Antúnez<sup>41</sup>, Alfonso Pastor Arias<sup>10,11</sup>, Miquel  
740 Baquero<sup>42</sup>, Olivia Belbin<sup>31,3</sup>, María Bernal Sánchez-Arjona<sup>27</sup>, Mercè Boada<sup>1,3</sup>, Mar Buendía<sup>1</sup>, Dolores Buiza-  
741 Rueda<sup>28,3</sup>, María Jesús Bullido<sup>17,3,18,19</sup>, Mariateresa Buongiorno<sup>36,37</sup>, Juan Andrés Burguera<sup>42</sup>, Miguel  
742 Calero<sup>29,3,43</sup>, Amanda Cano<sup>1,3</sup>, Pilar Cañabate<sup>1,3</sup>, Fernando Cardona Serrate<sup>8,9,3</sup>, Ángel Carracedo<sup>5,33</sup>, Fátima  
743 Carrillo<sup>28,3</sup>, María José Casajeros<sup>44</sup>, Jordi Clarimon<sup>31,3</sup>, Arturo Corbatón-Anchuelo<sup>23</sup>, Anaïs Corma-Gómez<sup>22</sup>, Paz  
744 de la Guía<sup>15</sup>, Itziar de Rojas<sup>1,3</sup>, Teodoro del Ser<sup>45</sup>, Susana Diego<sup>1</sup>, Mónica Diez-Fairen<sup>36,37</sup>, Oriol Dols-  
745 Icardo<sup>31,3</sup>, Ana Espinosa<sup>1</sup>, Marta Fernández-Fuertes<sup>22</sup>, Juan Fortea<sup>31,3</sup>, Emilio Franco-Macías<sup>27</sup>, Ana Frank-  
746 García<sup>19,3,46,47</sup>, Anna Gailhagenet<sup>1</sup>, Jose María García-Alberca<sup>15</sup>, Pablo García-González<sup>1,3</sup>, Sebastián García-  
747 Madrona<sup>44</sup>, Guillermo Garcia-Ribas<sup>44</sup>, Lorena Garrote-Espina<sup>28,3</sup>, Pilar Gómez-Garre<sup>28,3</sup>, Antonio González-  
748 Pérez<sup>32</sup>, Marina Guitart<sup>1</sup>, Raquel Huerto Vilas<sup>10,11</sup>, Marta Ibarria<sup>1</sup>, Silvia Jesús<sup>28,3</sup>, Miguel Angel Labrador  
749 Espinosa<sup>28,3</sup>, Asunción Lafuente<sup>1</sup>, Carmen Lage<sup>4,3</sup>, Agustina Legaz<sup>40</sup>, Alberto Lleó<sup>31,3</sup>, Sara López-  
750 García<sup>4,3</sup>, Adolfo Lopez de Munain<sup>12,13,3,14</sup>, Juan Macías<sup>22</sup>, Daniel Macías-García<sup>28,3</sup>, Salvadora  
751 Manzanares<sup>40</sup>, Marta Marín<sup>27</sup>, Juan Marín-Muñoz<sup>40</sup>, Olalla Maroñas<sup>5</sup>, Marta Marquié<sup>1,3</sup>, Elvira Martín<sup>1</sup>, Angel  
752 Martín Montés<sup>47,48</sup>, Begoña Martínez<sup>40</sup>, Victoriana Martínez<sup>40</sup>, Pablo Martínez-Lage Álvarez<sup>49</sup>, María Teresa  
753 Martínez-Larrad<sup>23,26</sup>, Marian Martinez de Pancorbo<sup>50</sup>, Carmen Martínez Rodríguez<sup>51,21</sup>, Miguel Medina<sup>3,29</sup>, Maite  
754 Mendioroz Iriarte<sup>52</sup>, Silvia Mendoza<sup>15</sup>, Manuel Menéndez-González<sup>21,53</sup>, Pablo Mir<sup>28,3</sup>, Laura Molina-  
755 Porcel<sup>30,54</sup>, Laura Montreal<sup>1</sup>, Mariona Moreno<sup>1</sup>, Fermin Moreno<sup>12,14,3</sup>, Laura Muñoz-Delgado<sup>28,3</sup>, Fuensanta  
756 Noguera Perea<sup>40</sup>, Raúl Núñez-Llaves<sup>1</sup>, Clàudia Olivé<sup>1</sup>, Gemma Ortega<sup>1</sup>, Ana Pancho<sup>1</sup>, Ana Belén Pastor<sup>29,55</sup>, Pau  
757 Pastor<sup>6,7</sup>, Ester Pelejá<sup>1</sup>, Alba Pérez-Cordón<sup>1</sup>, Jordi Pérez-Tur<sup>8,3,9</sup>, María Teresa Periñán<sup>28,3</sup>, Juan Antonio  
758 Pineda<sup>22</sup>, Rocío Pineda-Sánchez<sup>28,3</sup>, Gerard Piñol-Ripoll<sup>10,11</sup>, Silvia Preckler<sup>1</sup>, Raquel Puerta<sup>1,2</sup>, Inés  
759 Quintela<sup>5</sup>, Alberto Rábano<sup>29,55,3</sup>, Luis Miguel Real<sup>22</sup>, Diego Real de Asúa<sup>56</sup>, Eloy Rodríguez-Rodríguez<sup>4,3</sup>, Irene  
760 Rosas Allende<sup>20,21</sup>, Maitée Rosende-Roca<sup>1,3</sup>, Jose Luís Royo<sup>16</sup>, Agustín Ruiz<sup>1,3</sup>, María Eugenia Sáez<sup>32</sup>, Ángela  
761 Sanabria<sup>1,3</sup>, Pascual Sánchez-Juan<sup>4,3</sup>, Raquel Sánchez-Valle<sup>30</sup>, Isabel Sastre<sup>17,3</sup>, Manuel Serrano-Ríos<sup>23</sup>, Oscar



762 Sotolongo-Grau<sup>1</sup>, Lluís Tàrraga<sup>1,3</sup>, Sergi Valero<sup>1,3</sup>, Liliana Vargas<sup>1</sup>, María Pilar Vicente<sup>40</sup>, Laura Vivancos-  
763 Moreau<sup>40</sup>, Miren Zulaica<sup>14,3</sup>

764 <sup>1</sup>Research Center and Memory Clinic. Ace Alzheimer Center Barcelona – Universitat Internacional de Catalunya,  
765 Spain. <sup>2</sup>Universitat de Barcelona (UB). <sup>3</sup>CIBERNED, Network Center for Biomedical Research in  
766 Neurodegenerative Diseases, National Institute of Health Carlos III, Madrid, Spain. <sup>4</sup>Neurology Service, Marqués  
767 de Valdecilla University Hospital (University of Cantabria and IDIVAL), Santander, Spain. <sup>5</sup>Grupo de Medicina  
768 Xenómica, Centro Nacional de Genotipado (CEGEN-PRB3-ISCI). Universidade de Santiago de Compostela,  
769 Santiago de Compostela, Spain. <sup>6</sup>Unit of Neurodegenerative diseases, Department of Neurology, University  
770 Hospital Germans Trias i Pujol, Badalona, Barcelona, Spain. <sup>7</sup>The Germans Trias i Pujol Research Institute  
771 (IGTP), Badalona, Barcelona, Spain. <sup>8</sup>Unitat de Genètica Molecular, Institut de Biomedicina de València-CSIC,  
772 Valencia, Spain. <sup>9</sup>Unidad Mixta de Neurología Genética, Instituto de Investigación Sanitaria La Fe, Valencia,  
773 Spain. <sup>10</sup>Unitat Trastorns Cognitius, Hospital Universitari Santa Maria de Lleida, Lleida, Spain. <sup>11</sup>Institut de  
774 Recerca Biomedica de Lleida (IRBLLeida), Lleida, Spain. <sup>12</sup>Department of Neurology. Hospital Universitario  
775 Donostia. San Sebastian, Spain. <sup>13</sup>Department of Neurosciences. Faculty of Medicine and Nursery. University of  
776 the Basque Country, San Sebastián, Spain. <sup>14</sup>Neurosciences Area. Instituto Biodonostia. San Sebastian, Spain.  
777 <sup>15</sup>Alzheimer Research Center & Memory Clinic, Andalusian Institute for Neuroscience, Málaga, Spain.  
778 <sup>16</sup>Departamento de Especialidades Quirúrgicas, Bioquímica e Inmunología. School of Medicine. University of  
779 Malaga. Málaga, Spain. <sup>17</sup>Centro de Biología Molecular Severo Ochoa (UAM-CSIC). <sup>18</sup>Instituto de Investigación  
780 Sanitaria ‘Hospital la Paz’ (IdIPaz), Madrid, Spain. <sup>19</sup>Universidad Autónoma de Madrid. <sup>20</sup>Laboratorio de  
781 Genética. Hospital Universitario Central de Asturias, Oviedo, Spain. <sup>21</sup>Instituto de Investigación Sanitaria del  
782 Principado de Asturias (ISPA). <sup>22</sup>Unidad Clínica de Enfermedades Infecciosas y Microbiología. Hospital  
783 Universitario de Valme, Sevilla, Spain. <sup>23</sup>Instituto de Investigación Sanitaria del Hospital Clínico San Carlos  
784 (IdISSC), Hospital Clínico San Carlos. <sup>26</sup>Centro de Investigación Biomédica en Red de Diabetes y Enfermedades  
785 Metabólicas Asociadas (CIBERDEM). <sup>27</sup>Dementia Unit, Department of Neurology, Hospital Universitario Virgen  
786 del Rocío, Instituto de Biomedicina de Sevilla (IBiS), Sevilla, Spain. <sup>28</sup>Unidad de Trastornos del Movimiento,  
787 Servicio de Neurología y Neurofisiología. Instituto de Biomedicina de Sevilla (IBiS), Hospital Universitario  
788 Virgen del Rocío/CSIC/Universidad de Sevilla, Seville, Spain. <sup>29</sup>CIEN Foundation/Queen Sofia Foundation  
789 Alzheimer Center. <sup>30</sup>Alzheimer's disease and other cognitive disorders unit. Service of Neurology. Hospital Clínic  
790 of Barcelona. Institut d'Investigacions Biomèdiques August Pi i Sunyer, University of Barcelona, Barcelona,  
791 Spain. <sup>31</sup>Department of Neurology, Sant Pau Memory Unit, Sant Pau Biomedical Research Institute, Hospital de  
792 la Santa Creu i Sant Pau, Universitat Autònoma de Barcelona, Barcelona, Spain. <sup>32</sup>CAEBI, Centro Andaluz de  
793 Estudios Bioinformáticos, Sevilla, Spain. <sup>33</sup>Fundación Pública Galega de Medicina Xenómica – CIBERER-IDIS,  
794 Santiago de Compostela, Spain. <sup>36</sup>Fundació Docència i Recerca MútuaTerrassa, Terrassa, Barcelona, Spain.  
795 <sup>37</sup>Memory Disorders Unit, Department of Neurology, Hospital Universitari Mutua de Terrassa, Terrassa,  
796 Barcelona, Spain. <sup>38</sup>Servei de Neurologia. Hospital Clínic Universitari de València. <sup>39</sup>Department of Neurology,  
797 Hospital Universitario Son Espases, Palma, Spain. <sup>40</sup>Unidad de Demencias. Hospital Clínico Universitario Virgen  
798 de la Arrixaca, Palma, Spain. <sup>41</sup>Unidad de Demencias, Hospital Clínico Universitario Virgen de la Arrixaca,  
799 Murcia, Spain. <sup>42</sup>Servei de Neurologia, Hospital Universitari i Politènic La Fe, Valencia, Spain. <sup>43</sup>UFIEC,  
800 Instituto de Salud Carlos III. <sup>44</sup>Hospital Universitario Ramon y Cajal, IRYCIS, Madrid, Spain. <sup>45</sup>Department of

801 Neurology/CIEN Foundation/Queen Sofia Foundation Alzheimer Center. <sup>46</sup>Department of Neurology, La Paz  
802 University Hospital. Instituto de Investigación Sanitaria del Hospital Universitario La Paz. IdiPAZ. <sup>47</sup>Hospital La  
803 Paz Institute for Health Research, IdiPAZ, Madrid, Spain. <sup>48</sup>Department of Neurology, La Paz University  
804 Hospital. <sup>49</sup>Centro de Investigación y Terapias Avanzadas. Fundación CITA-Alzheimer, San Sebastián, Spain.  
805 <sup>50</sup>BIOMICS País Vasco; Centro de investigación Lascaray, Universidad del País Vasco UPV/EHU, Vitoria-  
806 Gasteiz, Spain. <sup>51</sup>Hospital de Cabueñes, Gijón, Spain. <sup>52</sup>Navarrabiomed, Pamplona, Spain. <sup>53</sup>Departamento de  
807 Medicina, Universidad de Oviedo, Oviedo, Spain. <sup>54</sup>Neurological Tissue Bank of the Biobanc-Hospital Clinic-  
808 IDIBAPS, Institut d'Investigacions Biomèdiques August Pi i Sunyer, Barcelona, Spain. <sup>55</sup>BT-CIEN. <sup>56</sup>Hospital  
809 Universitario La Princesa, Madrid, Spain.

810

### 811 **The FACEHBI study group**

812 JA Allué<sup>57</sup>, F Appiani<sup>1</sup>, DM Ariton<sup>1</sup>, M Berthier<sup>58</sup>, U Bojaryn<sup>1</sup>, M Buendia<sup>1</sup>, S Bullich<sup>59</sup>, F Campos<sup>60</sup>, P  
813 Cañabate<sup>1,3</sup>, L Cañada<sup>1</sup>, C Cuevas<sup>1</sup>, S Diego<sup>1</sup>, JM Escudero<sup>61</sup>, A Espinosa<sup>1,3</sup>, A Gailhajenet<sup>1</sup>, J Giménez<sup>61</sup>, M  
814 Gómez-Chiari<sup>61</sup>, M Guitart<sup>1</sup>, I Hernández<sup>1,3</sup>, M Ibarria<sup>1</sup>, A Lafuente<sup>1</sup>, N Leonart<sup>1</sup>, F Lomeña<sup>60</sup>, E Martín<sup>1</sup>, M  
815 Moreno<sup>1</sup>, A Morera<sup>1</sup>, N Muñoz<sup>1</sup>, A Niñerola<sup>60</sup>, AB Nogales<sup>1</sup>, L Núñez<sup>62</sup>, G Ortega<sup>1,3</sup>, A Páez<sup>62</sup>, A Pancho<sup>1</sup>, E  
816 Pelejà<sup>1</sup>, E Pérez-Martínez<sup>59</sup>, A Pérez-Cordon<sup>1</sup>, V Pérez-Grijalba<sup>57</sup>, M Pascual-Lucas<sup>57</sup>, A Perissinotti<sup>60</sup>, S  
817 Preckler<sup>1</sup>, M Ricciardi<sup>1</sup>, N Roé-Vellvé<sup>59</sup>, J Romero<sup>57</sup>, MI Ramis<sup>1</sup>, M Rosende-Roca<sup>1</sup>, M Sarasa<sup>57</sup>, S Seguer<sup>1</sup>, A  
818 Stephens<sup>59</sup>, MA Tejero<sup>61</sup>, J Terencio<sup>57</sup>, M Torres<sup>62</sup>, L Vargas<sup>1</sup>, A Vivas-Larruy<sup>61</sup>

819 <sup>1</sup>Research Center and Memory Clinic. Ace Alzheimer Center Barcelona – Universitat Internacional de Catalunya,  
820 Spain. <sup>3</sup>CIBERNED, Network Center for Biomedical Research in Neurodegenerative Diseases, National Institute  
821 of Health Carlos III, Madrid, Spain. <sup>57</sup>Araclon Biotech-Grífols.Zaragoza, Spain. <sup>58</sup>Cognitive Neurology and  
822 Aphasia Unit (UNCA). University of Malaga. Málaga, Spain. <sup>59</sup>Life Molecular Imaging GmbH. Berlin, Germany.  
823 <sup>60</sup>Servei de Medicina Nuclear, Hospital Clínic i Provincial. Barcelona, Spain. <sup>61</sup>Departament de Diagnòstic per la  
824 Imatge. Clínica Corachan,

825

## 826 **Funding**

827 The Genome Research @ Ace Alzheimer Center Barcelona project (GR@ACE) is supported by Grifols SA,  
828 Fundación bancaria 'La Caixa', Ace Alzheimer Center Barcelona and CIBERNED. Ace Alzheimer Center  
829 Barcelona is one of the participating centers of the Dementia Genetics Spanish Consortium (DEGESCO). The  
830 FACEHBI study is supported by funds from Ace Alzheimer Center Barcelona, Grifols, Life Molecular Imaging,  
831 Araclon Biotech, Alkahest, Laboratorio de análisis Echevarne and IrsiCaixa. Authors acknowledge the support of  
832 the Spanish Ministry of Science and Innovation, Proyectos de Generación de Conocimiento grants PID2021-  
833 122473OA-I00, PID2021-123462OB-I00 and PID2019-106625RB-I00. ISCIII, Acción Estratégica en Salud,  
834 integrated in the Spanish National R+D+I Plan and financed by ISCIII Subdirección General de Evaluación and  
835 the Fondo Europeo de Desarrollo Regional (FEDER "Una manera de hacer Europa") grants PI13/02434,

836 PI16/01861, PI17/01474, PI19/00335, PI19/01240, PI19/01301, PI22/01403, PI22/00258 and the ISCIII national  
837 grant PMP22/00022, funded by the European Union (NextGenerationEU). The support of CIBERNED (ISCIII)  
838 under the grants CB06/05/2004 and CB18/05/00010. The support from the ADAPTED and MOPEAD projects,  
839 European Union/EFPIA Innovative Medicines Initiative Joint (grant numbers 115975 and 115985, respectively);  
840 from PREADAPT project, Joint Program for Neurodegenerative Diseases (JPND) grant N° AC19/00097; from  
841 HARPONE project, Agency for Innovation and Entrepreneurship (VLAIO) grant N° PR067/21 and Janssen.  
842 DESCARTES project is funded by German Research Foundation (DFG). Additionally, IdR is supported by the  
843 Instituto de Salud Carlos III (ISCIII) under grant FI20/00215. PGG is supported by CIBERNED employment plan  
844 (CNV-304-PRF-866). ACF received support from the ISCIII under the grant *Sara Borrell* (CD22/00125). JEC  
845 received support from National Institute of Health award P30AG066546.  
846

## 847 **Author contributions**

848 ACF, IdR and AR designed and conceptualized the study and interpreted the data. RP, AR and IdR contributed to  
849 data acquisition, analysis, interpreted the data and co-wrote the manuscript. PGG, CO, OSG contributed to data  
850 interpretation. AR supervised the study. MA, SV, MMS, MB, PSJ, ACS, ACF, JEC, AR contributed to the critical  
851 revision of the paper. All authors critically revised the manuscript for important intellectual content and approved  
852 the final manuscript. GR@ACE/DEGESCO Data generation: RP, IdR, PGG, CO, AGS, FGG, LM, CL, IQ, NA,  
853 ERR, EAM, AO, AC, MES and ACF. Sample contribution: RP, IdR, PGG, CO, AGS, FGG, LM, VP, CL, IQ,  
854 NA, ERR, EAM, AO, PP, JPT, GPR, ALM, JMGA, JLR, MJB, VA, LMR, ACA, DGG, MML, EFM, PM, MM,  
855 ODI, LT, MA, SV, MMS, MB, PSJ, ACS, ACF and AR. Analysis: RP and IdR. Study supervision/management:  
856 LT, MB, PSJ, ACF and AR.

## 857 **Competing interests**

858 All authors declare that the research was conducted in the absence of any conflict of interest.

## 859 **Availability of data and materials**

860 The data that support the findings of this study are publicly available from the corresponding  
861 authors upon reasonable request. Additionally, the raw SOMAscan proteomic data is publicly  
862 accessible through the Alzheimer's Disease Data Initiative (ADDI) community.

863

## 864 **References**

- 865 1. El-Hayek YH, Wiley RE, Khoury CP, et al. Tip of the Iceberg: Assessing the Global  
866 Socioeconomic Costs of Alzheimer's Disease and Related Dementias and Strategic Implications  
867 for Stakeholders. *Journal of Alzheimer's Disease*. 2019;70:323-341. doi:10.3233/JAD-190426

- 868 2. 2022 Alzheimer's disease Facts and Figures: More Than Normal Aging: Understanding Mild  
869 Cognitive Impairment. *Alzheimer's & Dementia*. 2022;18(4):700-789.
- 870 3. Nandi A, Counts N, Chen S, et al. Global and regional projections of the economic burden of  
871 Alzheimer's disease and related dementias from 2019 to 2050: A value of statistical life  
872 approach. *EClinicalMedicine*. 2022;51(101580):1-10. doi:10.1016/j.eclinm.2022.101580
- 873 4. Bellenguez C, Küçükali F, Jansen I, et al. New insights on the genetic etiology of Alzheimer's  
874 and related dementia. *Nat Genet*. 2022;54:412-436. doi:https://doi.org/10.1038/s41588-022-  
875 01024-z
- 876 5. de Rojas I, Moreno-Grau S, Tesi N, et al. Common variants in Alzheimer's disease and risk  
877 stratification by polygenic risk scores. *Nat Commun*. 2021;12(1):1-16. doi:10.1038/s41467-021-  
878 22491-8
- 879 6. Ridge P, Adams PM, Albert MS, et al. Assessment of the genetic variance of late-onset  
880 Alzheimer's disease. *Neurobiol Aging*. 2016;41:200.e13-200.e20.  
881 doi:10.1016/j.neurobiolaging.2016.02.024
- 882 7. Glahn DC, Bearden CE, Niendam TA, Escamilla MA. The feasibility of neuropsychological  
883 endophenotypes in the search for genes associated with bipolar affective disorder. *Bipolar*  
884 *Disord*. 2004;6(3):171-182. doi:10.1111/j.1399-5618.2004.00113.x
- 885 8. Zhang Q, Cai Z, Lhomme M, et al. Inclusion of endophenotypes in a standard GWAS facilitate  
886 a detailed mechanistic understanding of genetic elements that control blood lipid levels.  
887 *Scientific Report Nature*. 2020;10(18434):1-14. doi:10.1038/s41598-020-75612-6
- 888 9. Jansen IE, van der Lee SJ, Gomez-Fonseca D, et al. Genome-wide meta-analysis for  
889 Alzheimer's disease cerebrospinal fluid biomarkers. *Acta Neuropathol*. 2022;144(5):821-842.  
890 doi:10.1007/S00401-022-02454-Z
- 891 10. Gottesman II, Todd Gould HD, FRCPsych. The Endophenotype Concept in Psychiatry:  
892 Etymology and Strategic Intentions. *American Journal of Psychiatry*. 2003;160:637-645.  
893 doi:10.1176/appi.ajp.160.4.636
- 894 11. Cruchaga C, Kauwe JS, Harari O, et al. GWAS of cerebrospinal fluid tau levels identifies novel  
895 risk variants for Alzheimer's disease The Alzheimer Disease Genetic Consortium (ADGC), and.  
896 *Neuron*. 2013;78(2):256-268. doi:10.1016/j.neuron.2013.02.026
- 897 12. Hall MH, Smoller JW. A New Role for Endophenotypes in the GWAS Era: Functional  
898 Characterization of Risk Variants. *Harv Rev Psychiatry*. 2010;18(1):67-74.  
899 doi:10.3109/10673220903523532
- 900 13. Deming Y, Li Z, Kapoor M, et al. Genome-wide association study identifies four novel loci  
901 associated with Alzheimer's endophenotypes and disease modifiers. *Acta Neuropathol*.  
902 2017;17(5):839-856. doi:10.1007/s00401-017-1685-y
- 903 14. Kauwe JSK, Wang J, Mayo K, et al. Alzheimer's disease risk variants show association with  
904 cerebrospinal fluid amyloid beta. *Neurogenetics*. 2009;10(1):13-17. doi:10.1007/s10048-008-  
905 0150-4
- 906 15. Hardy J, Higgins G. Alzheimer's disease: The amyloid cascade hypothesis. *Science (1979)*.  
907 1992;256(5054):184-185. doi:10.1126/science.1566067
- 908 16. Hardy J, Selkoe D. The Amyloid Hypothesis of Alzheimer's Disease: Progress and Problems on  
909 the Road to Therapeutics. *Science (1979)*. 2002;297:353-356.

- 910 17. Orellana A, García-gonzález P, Valero S, et al. Establishing In-House Cutoffs of CSF  
911 Alzheimer's Disease Biomarkers for the AT(N) Stratification of the Alzheimer Center Barcelona  
912 Cohort. *Int J Mol Sci.* 2022;23(13):1-18. doi:10.3390/IJMS23136891/S1
- 913 18. Rodriguez-Gomez O, Sanabria A, Perez-Cordon A, et al. FACEHBI: A Prospective Study of  
914 Risk Factors, Biomarkers and Cognition in a Cohort of Individuals with Subjective Cognitive  
915 Decline. Study Rationale and Research Protocols. *J Prev Alzheimers Dis.* 2017;4(2):100-108.  
916 doi:10.14283/jpad.2016.122
- 917 19. Moreno-Grau S, de Rojas I, Hernández I, et al. Genome-wide association analysis of dementia  
918 and its clinical endophenotypes reveal novel loci associated with Alzheimer's disease and three  
919 causality networks: The GR@ACE project. *Alzheimer's and Dementia.* 2019;15(10):1333-1347.  
920 doi:10.1016/j.jalz.2019.06.4950
- 921 20. Jessen F, Amariglio RE, van Boxtel M, et al. A conceptual framework for research on subjective  
922 cognitive decline in preclinical Alzheimer's disease. *Alzheimer's Dementia* . 2014;10(6):844-  
923 852. doi:10.1016/j.jalz.2014.01.001
- 924 21. Lopez OL, Jagust WJ, Dulberg C, et al. Risk factors for mild cognitive impairment in the  
925 cardiovascular health study cognition study. *Arch Neurol.* 2003;60(10):1394-1399.  
926 doi:10.1001/archneur.60.10.1394
- 927 22. Petersen RC, Caracciolo B, Brayne C, Gauthier S, Jelic V, Fratiglioni L. Mild cognitive  
928 impairment: a concept in evolution. *Journal of Intern Med.* 2014;275(3):214-228.  
929 doi:10.1111/joim.12190
- 930 23. Petersen RC, Smith GE, Waring SC, Ivnik RJ, Tangalos EG, Kokmen E. Mild Cognitive  
931 Impairment: Clinical Characterization and Outcome. *American Medical Association.*  
932 1999;56:303-308.
- 933 24. Jack CR, Bennett DA, Blennow K, et al. NIA-AA Research Framework: Toward a biological  
934 definition of Alzheimer's disease. *Alzheimer's & Dementia.* 2018;14(4):535-562.  
935 doi:10.1016/j.jalz.2018.02.018
- 936 25. Vanderstichele H, Bibl M, Engelborghs S, et al. Standardization of preanalytical aspects of  
937 cerebrospinal fluid biomarker testing for Alzheimer's disease diagnosis: A consensus paper from  
938 the Alzheimer's Biomarkers Standardization Initiative. *Alzheimer's & Dementia.* 2012;8(1):65-  
939 73. doi:10.1016/j.jalz.2011.07.004
- 940 26. Buschke H. Cued recall in Amnesia. *J Clin Neuropsychol.* 1984;6(4):433-440.  
941 doi:10.1080/01688638408401233
- 942 27. Alegret M, Valero S, Ortega G, et al. Validation of the Spanish Version of the Face Name  
943 Associative Memory Exam (S-FNAME) in Cognitively Normal Older Individuals. *Arch Clin*  
944 *Neuropsychol.* 2015;30(7):712-720. doi:10.1093/ARCLIN/ACV050
- 945 28. Wechsler D. A Standardized Memory Scale for Clinical Use. *The Journal of Psychology:*  
946 *Interdisciplinary and Applied.* 1945;19(1):87-95. doi:10.1080/00223980.1945.9917223
- 947 29. Sheikh JJ, Yesavage JA. Geriatric Depression Scale (GDS): Recent evidence and development  
948 of a shorter version. *Clinical Gerontologist: The Journal of Aging and Mental Health.* 1986;5(1-  
949 2):165-173. doi:10.1300/J018V05N01\_09
- 950 30. Morris JC. The Clinical Dementia Rating (CDR). *Neurology.* 1993;43(11):2412-2414.  
951 doi:10.1212/wnl.43.11.2412-a

- 952 31. Alcolea D, Pegueroles J, Muñoz L, et al. Agreement of amyloid PET and CSF biomarkers for  
953 Alzheimer's disease on Lumipulse. *Ann Clin Transl Neurol.* 2019;6(9):1815-1824.  
954 doi:10.1002/acn3.50873
- 955 32. López-García S, Lage C, Pozueta A, et al. Sleep Time Estimated by an Actigraphy Watch  
956 Correlates With CSF Tau in Cognitively Unimpaired Elders: The Modulatory Role of APOE.  
957 *Front Aging Neurosci.* 2021;13:1-9. doi:10.3389/FNAGI.2021.663446/FULL
- 958 33. Mueller SG, Weiner MW, Thal LJ, et al. Ways toward an early diagnosis in Alzheimer's disease:  
959 The Alzheimer's Disease Neuroimaging Initiative (ADNI). *Alzheimer's & Dementia.*  
960 2005;1(1):55-66. doi:10.1016/j.jalz.2005.06.003
- 961 34. ADNI | Alzheimer's Disease Neuroimaging Initiative. <https://adni.loni.usc.edu/>
- 962 35. Petersen RC, Aisen PS, Beckett LA, et al. Alzheimer's Disease Neuroimaging Initiative  
963 (ADNI): Clinical characterization. *Neurology.* 2010;74(3):201-209.  
964 doi:10.1212/WNL.0b013e3181cb3e25
- 965 36. Landau SM, Lu M, Joshi AD, et al. Comparing positron emission tomography imaging and  
966 cerebrospinal fluid measurements of  $\beta$ -amyloid. *Ann Neurol.* 2013;74(6):826-836.  
967 doi:10.1002/ana.23908
- 968 37. Shaw LM, Vanderstichele H, Knapik-Czajka M, et al. Cerebrospinal fluid biomarker signature  
969 in alzheimer's disease neuroimaging initiative subjects. *Ann Neurol.* 2009;65(4):403-413.  
970 doi:10.1002/ana.21610
- 971 38. PET Acquisition Methods ADNI. Accessed May 29, 2023.  
972 <https://adni.loni.usc.edu/methods/pet-analysis-method/pet-analysis/>
- 973 39. Rowe CC, Doré V, Jones G, et al. 18F-Florbetaben PET beta-amyloid binding expressed in  
974 Centiloids. *Eur J Nucl Med Mol Imaging.* 2017;44(12):2053-2059. doi:10.1007/S00259-017-  
975 3749-6/FIGURES/4
- 976 40. Klunk WE, Koeppe RA, Price JC, et al. The Centiloid Project: Standardizing quantitative  
977 amyloid plaque estimation by PET. *Alzheimer's & Dementia.* 2015;11(1):1-15.  
978 doi:10.1016/J.JALZ.2014.07.003
- 979 41. Saykin AJ, Shen L, Foroud TM, et al. Alzheimer's Disease Neuroimaging Initiative biomarkers  
980 as quantitative phenotypes: Genetics core aims, progress, and plans. *Alzheimers Dement.*  
981 2010;6(3):265-273. doi:10.1016/j.jalz.2010.03.013
- 982 42. Michigan Imputation Server. Accessed June 9, 2023.  
983 <https://imputationserver.sph.umich.edu/index.html#!>
- 984 43. Gold L, Ayers D, Bertino J, et al. Aptamer-Based Multiplexed Proteomic Technology for  
985 Biomarker Discovery. Gelain F, ed. *PLoS One.* 2010;5(12):e15004.  
986 doi:10.1371/journal.pone.0015004
- 987 44. Candia J, Cheung F, Kotliarov Y, et al. Assessment of Variability in the SOMAscan Assay.  
988 *Scientific Reports 2017 7:1.* 2017;7(1):1-13. doi:10.1038/s41598-017-14755-5
- 989 45. Chang CC, Chow CC, Tellier LCAM, Vattikuti S, Purcell SM, Lee JJ. Second-generation  
990 PLINK: Rising to the challenge of larger and richer datasets. *Gigascience.* 2015;4(1):1-16.  
991 doi:10.1186/S13742-015-0047-8/2707533
- 992 46. Willer CJ, Li Y, Abecasis GR. METAL: Fast and efficient meta-analysis of genomewide  
993 association scans. *Bioinformatics.* 2010;26(17):2190-2191. doi:10.1093/bioinformatics/btq340

- 994 47. Stouffer SA, Suchman EA, DeVinney LC, Star SA, Williams RM. American soldier:  
995 Adjustment during army life (Vol. 1). *Princeton University Press*. 1949;28(1):87-90.  
996 doi:10.2307/2572105
- 997 48. Ali M, Archer DB, Gorijala P, et al. Large multi-ethnic genetic analyses of amyloid imaging  
998 identify new genes for Alzheimer disease. *Acta Neuropathol Commun*. 2023;11(1):1-20.  
999 doi:10.1186/S40478-023-01563-4/FIGURES/4
- 1000 49. Lift Genome Annotations. Accessed November 20, 2023. [https://genome.ucsc.edu/cgi-](https://genome.ucsc.edu/cgi-bin/hgLiftOver)  
1001 [bin/hgLiftOver](https://genome.ucsc.edu/cgi-bin/hgLiftOver)
- 1002 50. Beecham GW, Hamilton K, Naj AC, et al. Genome-Wide Association Meta-analysis of  
1003 Neuropathologic Features of Alzheimer's Disease and Related Dementias. *PLoS Genet*.  
1004 2014;10(9):e1004606. doi:10.1371/JOURNAL.PGEN.1004606
- 1005 51. Purcell S, Neale B, Todd-Brown K, et al. PLINK: A tool set for whole-genome association and  
1006 population-based linkage analyses. *Am J Hum Genet*. 2007;81(3):559-575. doi:10.1086/519795
- 1007 52. Watanabe K, Taskesen E, Van Bochoven A, Posthuma D. Functional mapping and annotation  
1008 of genetic associations with FUMA. *Nat Commun*. 2017;8(1):1-11. doi:10.1038/s41467-017-  
1009 01261-5
- 1010 53. Higgins JPT, Thompson SG, Deeks JJ, Altman DG. Measuring inconsistency in meta-analyses.  
1011 *BMJ*. 2003;327(7414):557-560. doi:10.1136/BMJ.327.7414.557
- 1012 54. Zhu Z, Zhang F, Hu H, et al. Integration of summary data from GWAS and eQTL studies  
1013 predicts complex trait gene targets. *Nat Genet*. 2016;48(5):481-487. doi:10.1038/ng.3538
- 1014 55. Puerta R, Cano A, García-González P, et al. Head-to-head comparison of aptamer- and antibody-  
1015 based proteomic platforms in human cerebrospinal fluid samples from a real-world memory  
1016 clinic cohort. *medRxiv*. Published online July 18, 2024:2024.07.18.24310563.  
1017 doi:10.1101/2024.07.18.24310563
- 1018 56. Frick EA, Emilsson V, Jonmundsson T, et al. Serum proteomics reveal APOE-ε4-dependent and  
1019 APOE-ε4-independent protein signatures in Alzheimer's disease. *Nature Aging 2024*. Published  
1020 online August 21, 2024:1-19. doi:10.1038/s43587-024-00693-1
- 1021 57. Liao Y, Wang J, Jaehnig EJ, Shi Z, Zhang B. WebGestalt 2019: gene set analysis toolkit with  
1022 revamped UIs and APIs. *Nucleic Acids Res*. 2019;47(W1):W199-W205.  
1023 doi:10.1093/NAR/GKZ401
- 1024 58. Shen X, Zhang S, Guo Z, Xing D, Chen W. The crosstalk of ABCA1 and ANXA1: A potential  
1025 mechanism for protection against atherosclerosis. *Molecular Medicine*. 2020;26(1):1-8.  
1026 doi:10.1186/S10020-020-00213-Y/FIGURES/1
- 1027 59. Zhao B, Luo T, Li T, et al. Genome-wide association analysis of 19,629 individuals identifies  
1028 variants influencing regional brain volumes and refines their genetic co-architecture with  
1029 cognitive and mental health traits. *Nat Genet*. 2019;51(11):1637-1644. doi:10.1038/S41588-  
1030 019-0516-6
- 1031 60. Suhre K, Arnold M, Bhagwat AM, et al. Connecting genetic risk to disease end points through  
1032 the human blood plasma proteome. *Nat Commun*. 2017;8:1-14. doi:10.1038/NCOMMS14357
- 1033 61. Ries M, Loiola R, Shah UN, Gentleman SM, Solito E, Sastre M. The anti-inflammatory Annexin  
1034 A1 induces the clearance and degradation of the amyloid-β peptide. *J Neuroinflammation*.  
1035 2016;13(234):1-15. doi:10.1186/S12974-016-0692-6

- 1036 62. Kircher M, Witten DM, Jain P, et al. A general framework for estimating the relative  
1037 pathogenicity of human genetic variants. *Nat Genet.* 2014;46(3):310-315. doi:10.1038/ng.2892
- 1038 63. Brouwer RM, Klein M, Grasby KL, et al. Genetic variants associated with longitudinal changes  
1039 in brain structure across the lifespan. *Nature Neuroscience* 2022 25:4. 2022;25(4):421-432.  
1040 doi:10.1038/s41593-022-01042-4
- 1041 64. Homann J, Osburg T, Ohlei O, et al. Genome-Wide Association Study of Alzheimer's Disease  
1042 Brain Imaging Biomarkers and Neuropsychological Phenotypes in the European Medical  
1043 Information Framework for Alzheimer's Disease Multimodal Biomarker Discovery Dataset.  
1044 *Front Aging Neurosci.* 2022;14:1-14. doi:10.3389/FNAGI.2022.840651/BIBTEX
- 1045 65. Furney SJ, Simmons A, Breen G, et al. Genome-wide association with MRI atrophy measures  
1046 as a quantitative trait locus for Alzheimer's disease. *Mol Psychiatry.* 2010;16(11):1130-1138.  
1047 doi:10.1038/mp.2010.123
- 1048 66. Gouveia C, Gibbons E, Dehghani N, Eapen J, Guerreiro R, Bras J. Genome-wide association of  
1049 polygenic risk extremes for Alzheimer's disease in the UK Biobank. *Sci Rep.* 2022;12:1-12.  
1050 doi:10.1038/S41598-022-12391-2
- 1051 67. Hong S, Prokopenko D, Dobricic V, et al. Genome-wide association study of Alzheimer's  
1052 disease CSF biomarkers in the EMIF-AD Multimodal Biomarker Discovery dataset.  
1053 *Translational Psychiatry* 2020 10:1. 2020;10(1):1-12. doi:10.1038/s41398-020-01074-z
- 1054 68. Chibnik LB, White CC, Mukherjee S, et al. Susceptibility to neurofibrillary tangles: role of the  
1055 PTPRD locus and limited pleiotropy with other neuropathologies. *Mol Psychiatry.*  
1056 2018;23(6):1521-1529. doi:10.1038/MP.2017.20
- 1057 69. Raghavan NS, Dumitrescu L, Mormino E, et al. Association Between Common Variants in  
1058 RBFOX1, an RNA-Binding Protein, and Brain Amyloidosis in Early and Preclinical Alzheimer  
1059 Disease. *JAMA Neurol.* 2020;77(10):1288-1298. doi:10.1001/JAMANEUROL.2020.1760
- 1060 70. Kunkle BW, Grenier-Boley B, Sims R, et al. Genetic meta-analysis of diagnosed Alzheimer's  
1061 disease identifies new risk loci and implicates A $\beta$ , tau, immunity and lipid processing. *Nat*  
1062 *Genet.* 2019;51:414-430. doi:10.1038/s41588-019-0358-2
- 1063 71. Bigdeli TB, Fanous AH, Li Y, et al. Genome-Wide Association Studies of Schizophrenia and  
1064 Bipolar Disorder in a Diverse Cohort of US Veterans. *Schizophr Bull.* 2021;47(2):517-529.  
1065 doi:10.1093/SCHBUL/SBAA133
- 1066 72. Luciano M, Hagenaars SP, Davies G, et al. Association analysis in over 329,000 individuals  
1067 identifies 116 independent variants influencing neuroticism. *Nat Genet.* 2018;50(1):6-11.  
1068 doi:10.1038/S41588-017-0013-8
- 1069 73. Sherva R, Gross A, Mukherjee S, et al. Genome-wide association study of rate of cognitive  
1070 decline in Alzheimer's disease patients identifies novel genes and pathways. *Alzheimers*  
1071 *Dement.* 2020;16(8):1134-1145. doi:10.1002/ALZ.12106
- 1072 74. Lee E, Giovanello KS, Saykin AJ, et al. Single-nucleotide polymorphisms are associated with  
1073 cognitive decline at Alzheimer's disease conversion within mild cognitive impairment patients.  
1074 *Alzheimer's & Dementia: Diagnosis, Assessment & Disease Monitoring.* 2017;8(1):86-95.  
1075 doi:10.1016/J.DADM.2017.04.004
- 1076 75. Ramanan VK, Lesnick TG, Przybelski SA, et al. Coping with brain amyloid: genetic  
1077 heterogeneity and cognitive resilience to Alzheimer's pathophysiology. *Acta Neuropathol*  
1078 *Commun.* 2021;9(1):1-14. doi:10.1186/S40478-021-01154-1/FIGURES/4



- 1079 76. Leuba G, Vernay A, Vu D, et al. Differential expression of LMO4 protein in Alzheimer's  
1080 disease. *Neuropathol Appl Neurobiol.* 2004;30(1):57-69. doi:10.1046/J.0305-  
1081 1846.2003.00511.X
- 1082 77. Bernardo A, Harrison FE, McCord M, et al. Elimination of GD3 synthase improves memory  
1083 and reduces amyloid- $\beta$  plaque load in transgenic mice. *Neurobiol Aging.* 2009;30(11):1777-  
1084 1791. doi:10.1016/J.NEUROBIOLAGING.2007.12.022
- 1085 78. Hamano M, Ichinose T, Yasuda T, et al. Bioinformatics Analysis of the Molecular Networks  
1086 Associated with the Amelioration of Aberrant Gene Expression by a Tyr-Trp Dipeptide in  
1087 Brains Treated with the Amyloid- $\beta$  Peptide. *Nutrients.* 2023;15(12):2731.  
1088 doi:10.3390/NU15122731/S1
- 1089 79. Galiano MR, Goitea VE, Hallak ME. Post-translational protein arginylation in the normal  
1090 nervous system and in neurodegeneration. *J Neurochem.* 2016;138(4):506-517.  
1091 doi:10.1111/JNC.13708
- 1092 80. Wesenhagen KEJ, Gobom J, Bos I, et al. Effects of age, amyloid, sex, and APOE  $\epsilon$ 4 on the CSF  
1093 proteome in normal cognition. *Alzheimer's & Dementia: Diagnosis, Assessment & Disease*  
1094 *Monitoring.* 2022;14(1):e12286. doi:10.1002/DAD2.12286
- 1095 81. Do AN, Ali M, Timsina J, et al. CSF proteomic profiling with amyloid/tau positivity identifies  
1096 distinctive sex-different alteration of multiple proteins involved in Alzheimer's disease.  
1097 *medRxiv.* Published online March 16, 2024:2024.03.15.24304164.  
1098 doi:10.1101/2024.03.15.24304164
- 1099 82. Lambert JC, Ibrahim-Verbaas CA, Harold D, et al. Meta-analysis of 74,046 individuals  
1100 identifies 11 new susceptibility loci for Alzheimer's disease. *Nature Genetics* 2013 45:12.  
1101 2013;45(12):1452-1458. doi:10.1038/ng.2802
- 1102 83. Lambert JC, Heath S, Even G, et al. Genome-wide association study identifies variants at CLU  
1103 and CR1 associated with Alzheimer's disease. *Nat Genet.* 2009;41(10):1094-1100.  
1104 doi:10.1038/ng.439
- 1105 84. Harold D, Abraham R, Hollingworth P, et al. Genome-wide association study identifies variants  
1106 at CLU and PICALM associated with Alzheimer's disease. *Nat Genet.* 2009;41(10):1088-1093.  
1107 doi:10.1038/ng.440
- 1108 85. Corder EH, Saunders AM, Gaskell PC, et al. Gene Dose of Apolipoprotein E Type 4 Allele and  
1109 the Risk of Alzheimer's Disease in Late Onset Families. *Science (1979).* 1993;261:921-923.  
1110 doi:https://doi.org/10.1126/science.8346443
- 1111 86. Chapuis J, Flaig A, Grenier-Boley B, et al. Genome-wide, high-content siRNA screening  
1112 identifies the Alzheimer's genetic risk factor FERMT2 as a major modulator of APP  
1113 metabolism. *Acta Neuropathol.* 2017;133(6):955-966. doi:10.1007/S00401-016-1652-  
1114 Z/FIGURES/5
- 1115 87. Calero M, Rostagno A, Matsubara E, Zlokovic B, Frangione B, Ghiso J. Apolipoprotein J  
1116 (Clusterin) and Alzheimer's Disease. *Microsc Res Tech.* 2000;50:305-315.
- 1117 88. Harper JD, Fan KH, Aslam MM, et al. Genome-Wide Association Study of Incident Dementia  
1118 in a Community-Based Sample of Older Subjects. *Journal of Alzheimer's Disease.*  
1119 2022;88(2):787-798. doi:10.3233/JAD-220293

- 1120 89. Goudet C, Magnaghi V, Landry M, Nagy F, Gereau IV RW, Pin JP. Metabotropic receptors for  
1121 glutamate and GABA in pain. *Brain Res Rev.* 2009;60(1):43-56.  
1122 doi:10.1016/J.BRAINRESREV.2008.12.007
- 1123 90. Chen CH, Lee CS, Lee MTM, et al. Variant GADL1 and Response to Lithium Therapy in  
1124 Bipolar I Disorder . *New England Journal of Medicine.* 2014;370(2):119-128.  
1125 doi:10.1056/NEJMOA1212444
- 1126 91. Li S, Mallory M, Alford M, Tanaka S, Masliah E. Glutamate Transporter Alterations in  
1127 Alzheimer Disease Are Possibly Associated with Abnormal APP Expression. *J Neuropathol*  
1128 *Exp Neurol.* 1997;56(8):901-911. doi:10.1097/00005072-199708000-00008
- 1129 92. Molinuevo JL, Lladó A, Rami L. Memantine: Targeting glutamate excitotoxicity in Alzheimer's  
1130 disease and other dementias. <http://dx.doi.org/10.1177/153331750502000206>. 2005;20(2):77-  
1131 85. doi:10.1177/153331750502000206
- 1132 93. Domschke K, Hohoff C, Jacob C, et al. Chromosome 4q31-34 panic disorder risk locus:  
1133 Association of neuropeptide Y Y5 receptor variants. *American Journal of Medical Genetics Part*  
1134 *B: Neuropsychiatric Genetics.* 2008;147B(4):510-516. doi:10.1002/AJMG.B.30629
- 1135 94. Otowa T, Kawamura Y, Nishida N, et al. Meta-analysis of genome-wide association studies for  
1136 panic disorder in the Japanese population. *Transl Psychiatry.* 2012;2(11):1-8.  
1137 doi:10.1038/TP.2012.89
- 1138 95. Strozyk D, Blennow K, White LR, Launer LJ. CSF A $\beta$  42 levels correlate with amyloid-  
1139 neuropathology in a population-based autopsy study. *Neurology.* 2003;60(4):652-656.  
1140 doi:10.1212/01.WNL.0000046581.81650.D0
- 1141 96. Sabri O, Sabbagh MN, Seibyl J, et al. Florbetaben PET imaging to detect amyloid beta plaques  
1142 in Alzheimer's disease: Phase 3 study. *Alzheimer's & Dementia.* 2015;11(8):964-974.  
1143 doi:10.1016/J.JALZ.2015.02.004
- 1144 97. Remnestål J, Öijerstedt L, Ullgren A, et al. Altered levels of CSF proteins in patients with FTD,  
1145 presymptomatic mutation carriers and non-carriers. *Transl Neurodegener.* 2020;9(1):1-13.  
1146 doi:10.1186/S40035-020-00198-Y
- 1147 98. Erhardt A, Akula N, Schumacher J, et al. Replication and meta-analysis of TMEM132D gene  
1148 variants in panic disorder. *Transl Psychiatry.* 2012;2(9):1-6. doi:10.1038/TP.2012.85
- 1149 99. Haaker J, Lonsdorf TB, Raczka KA, Mechias ML, Gartmann N, Kalisch R. Higher anxiety and  
1150 larger amygdala volumes in carriers of a TMEM132D risk variant for panic disorder. *Transl*  
1151 *Psychiatry.* 2014;4(2):1-2. doi:10.1038/TP.2014.1
- 1152 100. Trubetskoy V, Pardiñas AF, Qi T, et al. Mapping genomic loci implicates genes and synaptic  
1153 biology in schizophrenia. *Nature* 2022 604:7906. 2022;604(7906):502-508.  
1154 doi:10.1038/s41586-022-04434-5
- 1155 101. Mattsson N, Insel PS, Donohue M, et al. Independent information from cerebrospinal fluid  
1156 amyloid- $\beta$  and florbetapir imaging in Alzheimer's disease. *Brain.* 2015;138(3):772-783.  
1157 doi:10.1093/BRAIN/AWU367
- 1158 102. Blennow K, Mattsson N, Schöll M, Hansson O, Zetterberg H. Amyloid biomarkers in  
1159 Alzheimer's disease. *Trends Pharmacol Sci.* 2015;36(5):297-309.  
1160 doi:10.1016/J.TIPS.2015.03.002

- 1161 103. Reimand J, Boon BDC, Collij LE, et al. Amyloid- $\beta$  PET and CSF in an autopsy-confirmed  
1162 cohort. *Ann Clin Transl Neurol*. 2020;7(11):2150-2160. doi:10.1002/ACN3.51195
- 1163 104. Kumar A, Janelidze S, Stomrud E, Palmqvist S, Hansson O, Mattsson-Carlsson N.  $\beta$ -Amyloid-  
1164 Dependent and -Independent Genetic Pathways Regulating CSF Tau Biomarkers in Alzheimer  
1165 Disease. *Neurology*. 2022;99(5):E476-E487. doi:10.1212/WNL.0000000000200605
- 1166 105. Jansen IE, Savage JE, Watanabe K, et al. Genome-wide meta-analysis identifies new loci and  
1167 functional pathways influencing Alzheimer's disease risk. *Nat Genet*. 2019;51(3):404-413.  
1168 doi:10.1038/S41588-018-0311-9
- 1169 106. Hong S, Prokopenko D, Dobricic V, et al. Genome-wide association study of Alzheimer's  
1170 disease CSF biomarkers in the EMIF-AD Multimodal Biomarker Discovery dataset. *Transl*  
1171 *Psychiatry*. 17:41. doi:10.1038/s41398-020-01074-z
- 1172 107. Bader JM, Geyer PE, Müller JB, et al. Proteome profiling in cerebrospinal fluid reveals novel  
1173 biomarkers of Alzheimer's disease. *Mol Syst Biol*. 2020;16(6):e9356.  
1174 doi:10.15252/MSB.20199356
- 1175 108. Hyman BT. Amyloid-Dependent and Amyloid-Independent Stages of Alzheimer Disease. *Arch*  
1176 *Neurol*. 2011;68(8):1062-1064. doi:10.1001/ARCHNEUROL.2011.70
- 1177 109. Leonenko G, Shoai M, Bellou E, et al. Genetic risk for alzheimer disease is distinct from genetic  
1178 risk for amyloid deposition. *Ann Neurol*. 2019;86(3):427-435. doi:10.1002/ANA.25530
- 1179 110. Asada-Utsugi M, Uemura K, Noda Y, et al. N-cadherin enhances APP dimerization at the  
1180 extracellular domain and modulates A $\beta$  production. *J Neurochem*. 2011;119(2):354-363.  
1181 doi:10.1111/J.1471-4159.2011.07364.X
- 1182 111. Terry RD, Masliah E, Salmon DP, et al. Physical basis of cognitive alterations in Alzheimer's  
1183 disease: synapse loss is the major correlate of cognitive impairment. *Ann Neurol*.  
1184 1991;30(4):572-580. doi:10.1002/ANA.410300410
- 1185 112. Uemura T. The cadherin superfamily at the synapse: More members, more missions. *Cell*.  
1186 1998;93(7):1095-1098. doi:10.1016/S0092-8674(00)81452-X
- 1187 113. Wu X, Reddy DS. Integrins as receptor targets for neurological disorders. *Pharmacol Ther*.  
1188 2012;134(1):68-81. doi:10.1016/J.PHARMTHERA.2011.12.008
- 1189 114. Bensamoun D, Guignard R, Furst AJ, et al. Associations between Neuropsychiatric Symptoms  
1190 and Cerebral Amyloid Deposition in Cognitively Impaired Elderly People. *Journal of*  
1191 *Alzheimer's Disease*. 2016;49(2):387-398. doi:10.3233/JAD-150181
- 1192 115. Kuo HC, Yen HC, Huang CC, Hsu WC, Wei HJ, Lin CL. Cerebrospinal fluid biomarkers for  
1193 neuropsychological symptoms in early stage of late-onset Alzheimer's disease.  
1194 <http://dx.doi.org/10.3109/002074542014971787>. 2014;125(10):747-754.  
1195 doi:10.3109/00207454.2014.971787
- 1196 116. Cai WJ, Tian Y, Ma YH, Dong Q, Tan L, Yu JT. Associations of Anxiety with Amyloid, Tau,  
1197 and Neurodegeneration in Older Adults without Dementia: A Longitudinal Study. *Journal of*  
1198 *Alzheimer's Disease*. 2021;82(1):273-283. doi:10.3233/jad-210020
- 1199 117. Lahiri DK, Maloney B, Wang R, Sokol DK, Rogers JT, Westmark CJ. How autism and  
1200 Alzheimer's disease are TrAPPed. *Molecular Psychiatry* 2020 26:1. 2020;26(1):26-29.  
1201 doi:10.1038/s41380-020-00928-8

- 1202 118. Liu F, Arias-Vásquez A, Slegers K, et al. A genomewide screen for late-onset Alzheimer  
1203 disease in a genetically isolated Dutch population. *Am J Hum Genet.* 2007;81(1):17-31.  
1204 doi:10.1086/518720
- 1205 119. Li Z, Liu L, Lin W, et al. NRG3 contributes to cognitive deficits in chronic patients with  
1206 schizophrenia. *Schizophr Res.* 2020;215:134-139. doi:10.1016/J.SCHRES.2019.10.060
- 1207 120. Hollingworth P, Sweet R, Sims R, et al. Genome-wide association study of Alzheimer's disease  
1208 with psychotic symptoms. *Molecular Psychiatry* 2012 17:12. 2011;17(12):1316-1327.  
1209 doi:10.1038/mp.2011.125
- 1210 121. Wang KS, Xu N, Wang L, et al. NRG3 gene is associated with the risk and age at onset of  
1211 Alzheimer disease. *J Neural Transm.* 2014;121(2):183-192. doi:10.1007/S00702-013-1091-0
- 1212 122. Morar B, Dragović M, Waters FAV, Chandler D, Kalaydjieva L, Jablensky A. Neuregulin 3  
1213 (NRG3) as a susceptibility gene in a schizophrenia subtype with florid delusions and relatively  
1214 spared cognition. *Molecular Psychiatry* 2011 16:8. 2010;16(8):860-866.  
1215 doi:10.1038/mp.2010.70
- 1216 123. Zhang T, Zhu L, Ni T, et al. Voltage-gated calcium channel activity and complex related genes  
1217 and schizophrenia: A systematic investigation based on Han Chinese population. *J Psychiatr*  
1218 *Res.* 2018;106:99-105. doi:10.1016/J.JPSYCHIRES.2018.09.020
- 1219 124. Potkin SG, Turner JA, Guffanti G, et al. A Genome-Wide Association Study of Schizophrenia  
1220 Using Brain Activation as a Quantitative Phenotype. *Schizophr Bull.* 2009;35(1):96-108.  
1221 doi:10.1093/SCHBUL/SBN155
- 1222 125. Suda S, Iwata K, Shimmura C, et al. Decreased expression of axon-guidance receptors in the  
1223 anterior cingulate cortex in autism. *Mol Autism.* 2011;2(1):1-5. doi:10.1186/2040-2392-2-14
- 1224 126. Zuko A, Kleijer KTE, Oguro-Ando A, et al. Contactins in the neurobiology of autism. *Eur J*  
1225 *Pharmacol.* 2013;719(1-3):63-74. doi:10.1016/J.EJPHAR.2013.07.016
- 1226 127. Tosto G, Fu H, Vardarajan BN, et al. F-box/LRR-repeat protein 7 is genetically associated with  
1227 Alzheimer's disease. *Ann Clin Transl Neurol.* 2015;2(8):810-820. doi:10.1002/ACN3.223
- 1228 128. Dauar MT, Labonté A, Picard C, et al. Characterization of the contactin 5 protein and its risk-  
1229 associated polymorphic variant throughout the Alzheimer's disease spectrum. *Alzheimer's &*  
1230 *Dementia.* Published online 2022:1-15. doi:10.1002/ALZ.12868
- 1231 129. Cano A, Esteban-de-Antonio E, Bernuz M, et al. Plasma extracellular vesicles reveal early  
1232 molecular differences in amyloid positive patients with early-onset mild cognitive impairment.  
1233 *J Nanobiotechnology.* 2023;21(1):1-19. doi:10.1186/S12951-023-01793-7
- 1234 130. Van Der Meer D, Kaufmann T, Shadrin AA, et al. The genetic architecture of human cortical  
1235 folding. *Sci Adv.* 2021;7(51):9446. doi:10.1126/SCIADV.ABJ9446
- 1236 131. Borenstein M, Hedges L V., Higgins JPT, Rothstein HR. Introduction to meta-analysis.  
1237 *Introduction to Meta-Analysis.* Published online January 1, 2009:1-421.  
1238 doi:10.1002/9780470743386
- 1239 132. Yoon S, Baik B, Park T, Nam D. Powerful p-value combination methods to detect incomplete  
1240 association. *Scientific Reports* 2021 11:1. 2021;11(1):1-11. doi:10.1038/s41598-021-86465-y
- 1241
- 1242

1243

1244

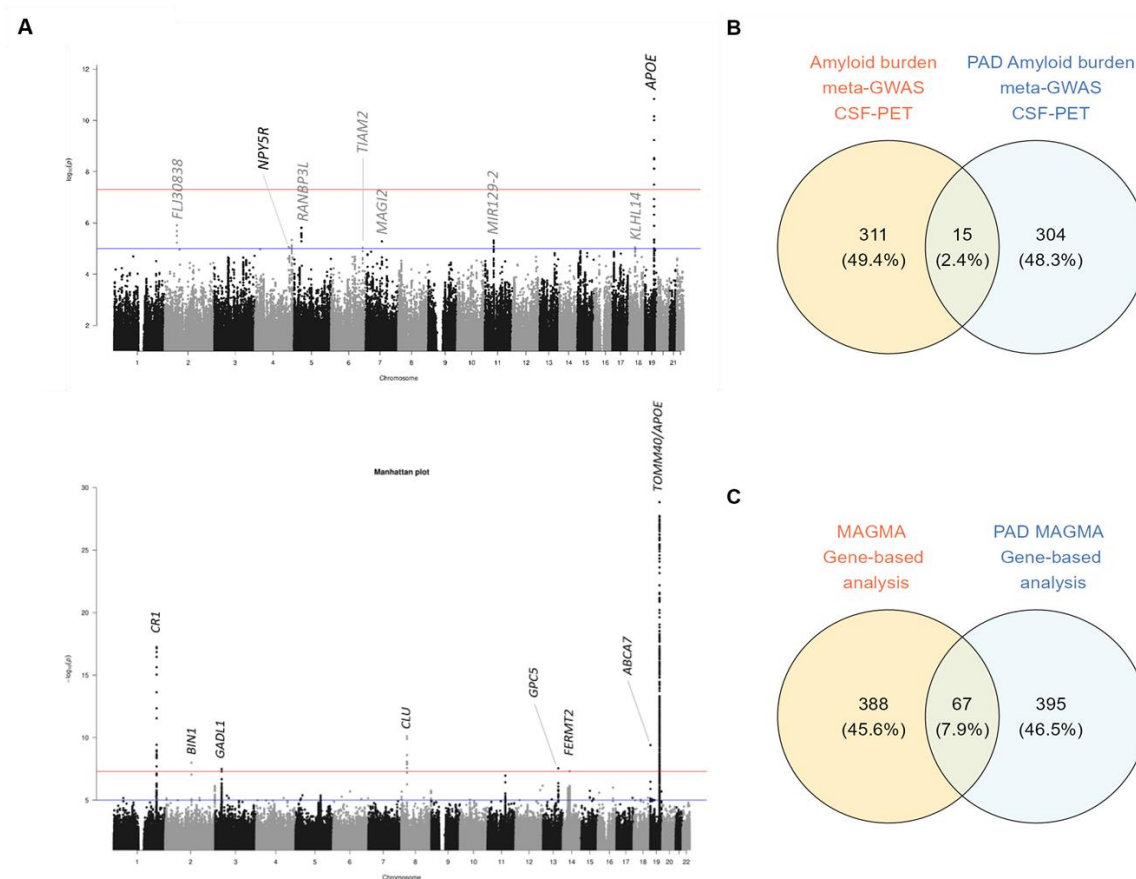

1245

1246 **Figure 1. Plots of the  $A\beta$  burden meta-analysis combining data of CSF-PET endophenotypes.** A) (upper) Manhattan plot of  
 1247 our CSF-PET meta-analysis (n=2,076). Results were filtered according effect size direction and dataset missingness.  
 1248 Suggestive independent markers were annotated with the nearest gene name. Mapped genes coloured in grey represent those  
 1249 that were not replicated in the PAD CSF-PET meta-GWAS. (lower) Manhattan plot of the PAD CSF-PET meta-analysis  
 1250 filtered (n=23,532). Genome-wide significant independent markers were annotated with the nearest gene name. The Y-axis  
 1251 was restricted to visualize suggestive signals. The genome-wide significance threshold was set to  $P < 5e-08$  (red line) and the  
 1252 suggestive threshold was set to  $P < 1e-05$  (blue line). B) Venn diagram representing the overlap between the top 500 ranking  
 1253 of independent genetic markers comparing the PAD and our amyloid burden meta-analysis. C) Venn diagram representing  
 1254 the overlap between the top 500 ranking of independent genes in the PAD and our gene-based analysis.

1255

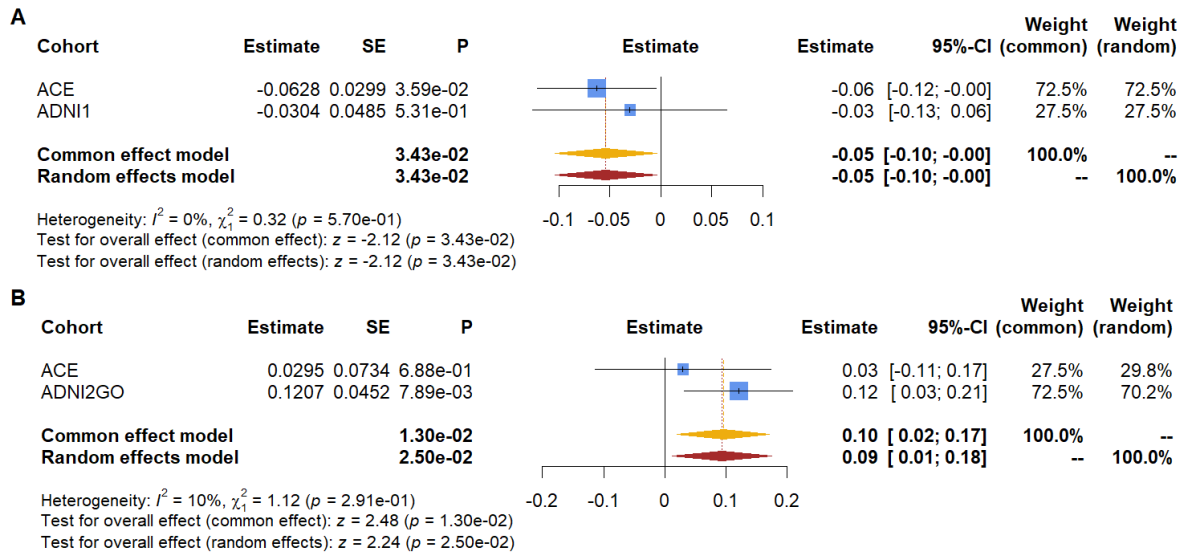

1256

1257 **Figure 2. Forest plot of the meta-analysis association between the AD PRS. A) CSF Aβ42, and B) Aβ PET endophenotypes.**

1258 *The significance threshold was set to 0.05.*

1259

1260

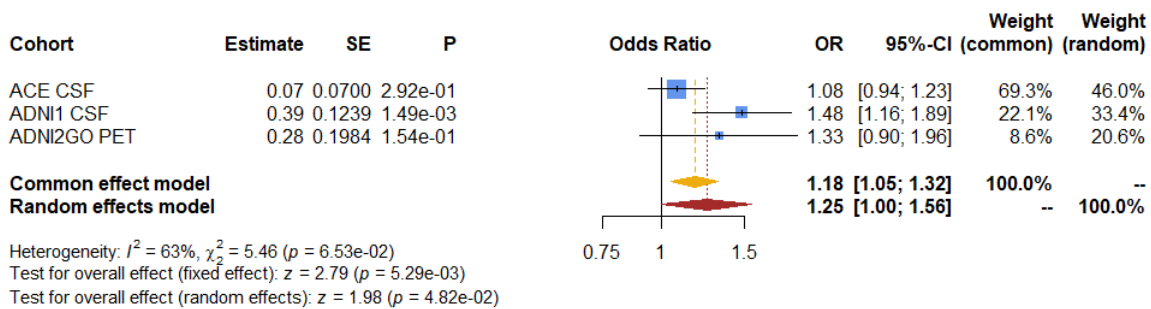

1261

1262 **Figure 3. Forest plot of the meta-analysis association between the AD PRS and dementia status as case-control. In ACE**

1263 *(305 cases and 703 controls, 30.25%), ADNI1 (94 cases and 285 controls, 24.80%) and ADNI2GO cohorts (27 cases and 385*

1264 *controls, 6.55%).*

1265

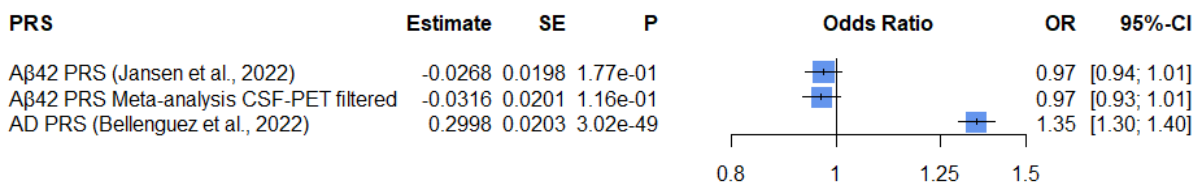

1266

1267 **Figure 4. Forest plot of the association between the AD, Aβ PRS and case-control status. PRS for AD (76 SNPs from**

1268 *Bellenguez et al., 2022) and Aβ42 (30 SNPs from Jansen et al., 2022, 9 SNPs from our meta-analysis). The GR@ACE cohort*

1269 *included 8110 cases and 9640 controls.*

1270

1271

1272

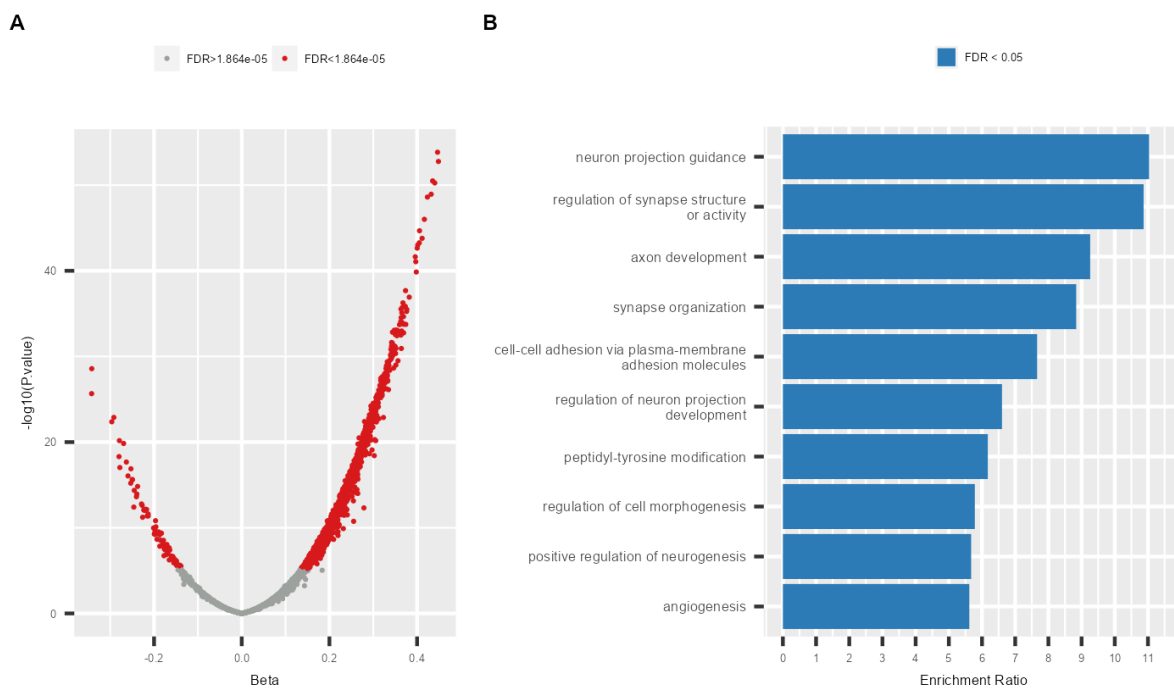

1273

1274 **Figure 5. Associations between CSF SOMAscan and CSF A $\beta$ 42 levels.** A) Volcano plot only considering proteins with good  
1275 inter-assay correlation ( $n=2,682$ ), significant proteins ( $FDR < 1.864e-05$ ) were highlighted in red ( $n=1,387$ ). B) Top 10  
1276 results of the enrichment analysis of significant protein associations with CSF A $\beta$ 42 levels using the WebGestalt tool.

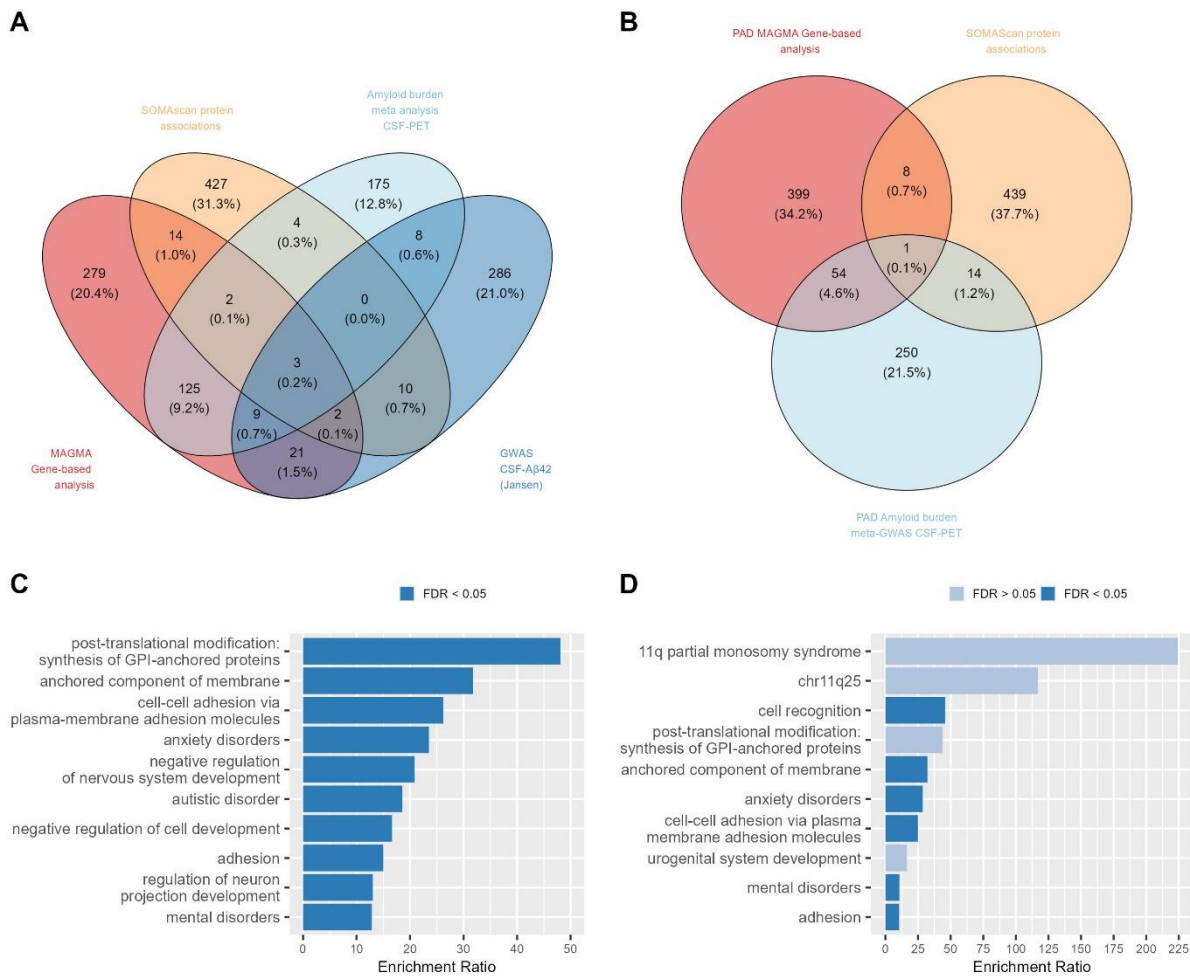

1277

1278 **Figure 6. Overlapping loci/proteins in genomic and proteomic analysis.** A) Venn diagram of the top 500 ranking of CSF  
1279 *Aβ42*-associated proteins in the SOMAScan panel (orange), our gene-based MAGMA analysis (red), GWAS of CSF *Aβ42*  
1280 (Jansen et al., 2022) (dark blue) and our amyloid burden meta-analysis of filtered CSF-PET endophenotypes (light blue). B)  
1281 Venn diagram of the top 500 ranking of CSF *Aβ42*-associated proteins in the SOMAScan panel (orange), PAD gene-based  
1282 MAGMA meta-analysis (red) and PAD amyloid burden meta-analysis of filtered CSF-PET endophenotypes (light blue). C)  
1283 Top 10 enrichment analysis results of the overlapping proteins between our genomic and proteomic analyses. C) Top 10  
1284 enrichment analysis results of the overlapping proteins between proteomic and PAD genomic analyses. The analysis was done  
1285 using the WebGestalt tool.

1286

1287

1288

1289

1290

1291

1292



1293 **Table 1. Results of the genome wide meta-analysis filtered combining CSF and PET endophenotypes (4.9% of total SNPs).**

1294 **Bold: significant results  $P < 5e-08$  with consistent effect direction.**

| rsID            | SNP                | Nearest Gene        | REF      | ALT      | A1       | FreqA1       | Call Rate | n           | Zscore         | P-value         | Direction     |
|-----------------|--------------------|---------------------|----------|----------|----------|--------------|-----------|-------------|----------------|-----------------|---------------|
| <b>rs429358</b> | <b>19:45411941</b> | <b>APOE (0 kb)</b>  | <b>T</b> | <b>C</b> | <b>C</b> | <b>0.211</b> | 1.000     | <b>2076</b> | <b>-17.259</b> | <b>9.50E-67</b> | <b>----++</b> |
| rs78402940      | 2:59125664         | FLJ30838 (0 kb)     | A        | G        | G        | 0.089        | 0.999     | 1979        | -4.849         | 1.24E-06        | --?-++        |
| rs62354504      | 5:36361976         | RANBP3L (59.96 kb)  | G        | A        | A        | 0.027        | 0.999     | 1262        | -4.807         | 1.53E-06        | ?-?-+?        |
| rs62340552      | 4:180023617        | NA                  | C        | T        | T        | 0.041        | 0.993     | 1798        | -4.582         | 4.61E-06        | --?-+?        |
| rs2902373       | 11:43637563        | MIR129-2 (34.53 kb) | C        | T        | T        | 0.222        | 0.993     | 2076        | -4.571         | 4.84E-06        | ----++        |
| rs73141455      | 7:78648931         | MAGI2 (0 kb)        | G        | T        | T        | 0.038        | 0.995     | 1798        | -4.555         | 5.24E-06        | --?-+?        |
| rs115822934     | 4:164308011        | NPY5R (34.92 kb)    | G        | T        | T        | 0.032        | 0.998     | 1798        | -4.448         | 8.65E-06        | ++?+?-?       |
| rs1523589       | 18:30242590        | KLHL14 (-10.04 kb)  | C        | A        | A        | 0.201        | 0.996     | 2076        | -4.440         | 8.99E-06        | ++++--        |
| rs4395536       | 4:168504316        | NA                  | A        | G        | G        | 0.914        | 0.987     | 1979        | -4.435         | 9.23E-06        | ++?+--        |
| rs11963901      | 6:155436138        | TIAM2 (0 kb)        | C        | T        | T        | 0.106        | 0.999     | 1979        | -4.434         | 9.23E-06        | --?-++        |

Note: Meta-analysis was performed using a sample size weighted method without considering effect size direction and filtered by effect size and data availability in at least half of each endophenotypes cohorts. Reference SNP (rs) code for the SNP: rsID, Genetic markers in GRCh37/hg19 genomic assembly: SNP, Reference allele: REF, Alternative allele: ALT, Effect allele: A1, Sample size: n.

1295

1296

1297

1298

1299

1300

1301

1302

1303

1304

1305

1306

1307

1308 **Table 2. Gene-based MAGMA results from FUMA analysis considering genome-wide significant results  $P < 4.235e-06$ .**

| Gene     | EntrezID | UniProtID | CHR | Start     | Stop      | n<br>SNPS | Zscore | P-value   |
|----------|----------|-----------|-----|-----------|-----------|-----------|--------|-----------|
| NECTIN2  | 5819     | Q92692    | 19  | 45349432  | 45392485  | 37        | 7.787  | 3.442E-15 |
| APOE     | 348      | P02649    | 19  | 45409011  | 45412650  | 4         | 7.282  | 1.648E-13 |
| APOC1    | 341      | P02654    | 19  | 45417504  | 45422606  | 5         | 6.774  | 6.278E-12 |
| CSMD1    | 64478    | Q96PZ7    | 8   | 2792875   | 4852494   | 929       | 6.437  | 6.076E-11 |
| TOMM40   | 10452    | O96008    | 19  | 45393826  | 45406946  | 24        | 6.109  | 5.000E-10 |
| WWOX     | 51741    | Q9NZC7    | 16  | 78133310  | 79246564  | 323       | 5.566  | 1.307E-08 |
| LHPP     | 64077    | Q9H008    | 10  | 126150403 | 126306457 | 153       | 5.507  | 1.822E-08 |
| BCL3     | 602      | P20749    | 19  | 45250962  | 45263301  | 6         | 5.449  | 2.540E-08 |
| CNTN5    | 53942    | O94779    | 11  | 98891683  | 100229616 | 556       | 5.358  | 4.217E-08 |
| TENM3    | 55714    | Q9P273    | 4   | 183065140 | 183724177 | 114       | 5.312  | 5.432E-08 |
| PTPRD    | 5789     | P23468    | 9   | 8314246   | 10612723  | 332       | 5.258  | 7.272E-08 |
| TIAM2    | 26230    | Q8IVF5    | 6   | 155153831 | 155578857 | 60        | 5.243  | 7.904E-08 |
| RBFOX1   | 54715    | Q9NWB1    | 16  | 6069095   | 7763340   | 382       | 5.079  | 1.900E-07 |
| GPC5     | 2262     | P78333    | 13  | 92050929  | 93519490  | 275       | 4.956  | 3.604E-07 |
| RORA     | 6095     | P35398    | 15  | 60780483  | 61521518  | 185       | 4.827  | 6.948E-07 |
| MACROD2  | 140733   | A1Z1Q3    | 20  | 13976015  | 16033842  | 354       | 4.787  | 8.471E-07 |
| TMEM132D | 121256   | Q14C87    | 12  | 129556270 | 130388211 | 205       | 4.759  | 9.717E-07 |
| CDH13    | 1012     | P55290    | 16  | 82660408  | 83830204  | 315       | 4.592  | 2.201E-06 |
| LRP1B    | 53353    | Q9NZR2    | 2   | 140988992 | 142889270 | 318       | 4.549  | 2.696E-06 |
| KIR3DX1  | 90011    | Q9H7L2    | 19  | 55043909  | 55057053  | 9         | 4.487  | 3.616E-06 |
| FAM53B   | 9679     | Q14153    | 10  | 126307861 | 126432838 | 42        | 4.479  | 3.751E-06 |

Chromosome: CHR, Number of SNPs: NSNP, Sample size: n, Entrez Gene Identifier: EntrezID, UniProt Swiss Protein Identifier: UniProtID.

1309
